1 **The zinc finger antiviral protein ZAP destabilises viral transcripts and restricts human**  
2 **cytomegalovirus**

3  
4 Ana Cristina Gonzalez-Perez<sup>1</sup>, Markus Stempel<sup>1,2</sup>, Emanuel Wyler<sup>3</sup>, Christian Urban<sup>4</sup>, Antonio  
5 Piras<sup>4</sup>, Thomas Hennig<sup>5,6</sup>, Albert Heim<sup>7</sup>, Markus Landthaler<sup>3,8</sup>, Andreas Pichlmair<sup>4</sup>, Florian  
6 Erhard<sup>5,6#</sup>, Lars Dölken<sup>5,6#</sup>, Melanie M. Brinkmann<sup>1,2\*</sup>

7  
8 <sup>1</sup>Viral Immune Modulation Research Group, Helmholtz Centre for Infection Research, Inhoffenstr. 7,  
9 38124 Braunschweig, Germany

10 <sup>2</sup>Institute of Genetics, Technische Universität Braunschweig, Spielmannstr. 7, 38106  
11 Braunschweig, Germany

12 <sup>3</sup>Berlin Institute for Medical Systems Biology, Max-Delbrück-Center for Molecular Medicine, 13125  
13 Berlin, Germany

14 <sup>4</sup>School of Medicine, Institute of Virology, Technical University of Munich, Schneckenburgerstr. 8,  
15 81675 Munich, Germany

16 <sup>5</sup>Institute for Virology and Immunobiology, Julius-Maximilians-Universität Würzburg, Versbacher  
17 Str. 7, 97078 Würzburg, Germany

18 <sup>6</sup>Helmholtz-Institute for RNA-based Infection Research, HIRI, Josef-Schneider-Straße 2/D15,  
19 97080 Würzburg, Germany

20 <sup>7</sup>Institute of Virology, Hannover Medical School, Carl-Neuberg Str. 1, 30625 Hannover, Germany

21 <sup>8</sup>IRI Life Sciences, Institute of Biology, Humboldt-Universität Berlin, Philippstraße 13, 10115 Berlin,  
22 Germany

23

24 #contributed equally

25 \*correspondence: [m.brinkmann@tu-braunschweig.de](mailto:m.brinkmann@tu-braunschweig.de)

26

27 Running title: ZAP destabilises specific HCMV transcripts

28

29 Keywords: ZAP, ZC3HAV1, ISG, antiviral, DNA virus, herpesvirus, HCMV, innate immunity

30

31 The article is formatted in British English.

32 **Abstract**

33

34 Interferon-stimulated gene products (ISGs) play a crucial role in early infection control. The ISG zinc  
35 finger CCCH-type antiviral protein 1 (ZAP/ZC3HAV1) antagonises several RNA viruses by binding  
36 to CG-rich RNA sequences, whereas its effect on DNA viruses is largely unknown. Here, we  
37 decipher the role of ZAP in the context of human cytomegalovirus (HCMV) infection, a  
38  $\beta$ -herpesvirus that is associated with high morbidity in immunosuppressed individuals and  
39 newborns. We show that expression of the two major isoforms of ZAP, the long (ZAP-L) and short  
40 (ZAP-S), is induced during HCMV infection and that both negatively affect HCMV replication.  
41 Transcriptome and proteome analyses demonstrated that the expression of ZAP decelerates the  
42 progression of HCMV infection. SLAM-sequencing revealed that ZAP restricts HCMV at early  
43 stages of infection by destabilising a distinct subset of viral transcripts with low CG content. In  
44 summary, this report provides evidence of an important antiviral role for ZAP in host defense  
45 against HCMV infection and highlights its differentiated function during DNA virus infection.

## 46 **Introduction**

47

48 Viral infections pose a major global health burden as the cause of a range of debilitating human  
49 diseases with the potential to paralyse countries. Herpesviruses are large, structurally complex  
50 DNA viruses belonging to the *Herpesviridae*. Within this family, a number of viruses are responsible  
51 for a variety of diseases in humans ranging from cold sores and pneumonia to cancer. The common  
52 peculiarity of herpesviruses lies in their ability to establish latency, which presents a great challenge  
53 in medicine due to severe complications resulting from virus reactivation. Human cytomegalovirus  
54 (HCMV) is one of the nine human herpesviruses described to date and the prototype virus of the  
55 *Betaherpesvirinae* subfamily. HCMV displays a coding capacity that far exceeds that of most other  
56 *Herpesviridae*, having the largest genome among all known human viruses and the capacity to  
57 encode more than 200 proteins. Primary HCMV infection generally causes mild symptoms in  
58 immunocompetent individuals (Cohen & Corey, 1985). However, immunosuppressed individuals,  
59 such as AIDS patients or transplant recipients, are vulnerable to HCMV-related disease (Meyers *et*  
60 *al*, 1986; Zamora, 2004). In addition, HCMV is the leading cause of congenital viral infection  
61 worldwide, and can result in serious long-term sequelae in newborns such as hearing loss, vision  
62 abnormalities, microcephaly, or developmental delays (Ramsay *et al*, 1991).

63 The host innate immune system, as the first line of defence, is equipped with germline-encoded  
64 pattern recognition receptors (PRRs), a group of sensors that detect pathogens by recognising  
65 pathogen-associated molecular patterns (PAMPs). The detection of PAMPs induces downstream  
66 signalling culminating in the activation of several transcription factors including interferon regulatory  
67 factors (IRF) and nuclear factor kappa-light-chain-enhancer of activated B cells (NF- $\kappa$ B), leading to  
68 the induction of genes encoding for type I interferons (IFNs), proinflammatory cytokines and  
69 non-canonical interferon-stimulated genes (ISGs) (Schoggins *et al*, 2014). Upon binding type I  
70 IFNs, the interferon- $\alpha/\beta$  receptor (IFNAR) is activated and its signalling results in nuclear  
71 translocation of STAT1 and STAT2 transcription factors and induction of canonical ISGs (reviewed

72 in Schneider *et al*, 2014). ISGs are essential antiviral effectors and constitute a group of cellular  
73 factors ranging from PRR (e.g. IFI16, cGAS or RIG-I) or transcription factors to pro-apoptotic  
74 proteins or proteins involved in the regulation of the immune response (Gonzalez-Perez *et al*,  
75 2020).

76 The zinc finger CCCH-type antiviral protein 1, also known as ZAP, ZC3HAV1 or PARP13, belongs  
77 to the subset of non-canonical ISGs whose expression can be induced via IRF3 directly as well as  
78 canonically by IFNAR signalling (Schoggins *et al.*, 2014). Four isoforms of ZAP that originate from  
79 alternative splicing of the *ZC3HAV1* gene have been reported thus far (Li *et al*, 2019), with the long  
80 (ZAP-L) and the short (ZAP-S) isoforms being the most prominent ones. While approximately 700  
81 amino acids are shared by ZAP-L and ZAP-S, ZAP-L has an extended C-terminus of around 200  
82 amino acids containing a catalytically inactive PARP-like domain (Kerns *et al*, 2008) and a  
83 functional CaaX prenylation motif (Charron *et al*, 2013). The farnesyl modification on the cysteine  
84 residues of the CaaX motif increases the hydrophobicity of ZAP-L, targeting this isoform to  
85 membranes in endolysosomes (Charron *et al.*, 2013). Both ZAP isoforms are equipped with an  
86 N-terminal zinc finger domain (containing four CCCH-type zinc finger motifs), a TiPARP homology  
87 domain (TPH), which is well conserved among ZAP paralogs and contains a fifth zinc finger motif,  
88 and a WWE domain, predicted to mediate specific protein-protein interactions (Aravind, 2001;  
89 Katoh & Katoh, 2003).

90 ZAP exhibits broad antiviral activity against a variety of RNA viruses by binding RNA and mediating  
91 its degradation (Guo *et al*, 2007). The antiviral activity of ZAP was demonstrated against  
92 alphaviruses (Bick *et al*, 2003), filoviruses (Muller *et al*, 2007), retroviruses (Takata *et al*, 2017; Zhu  
93 *et al*, 2011), and flaviviruses (Chiu *et al*, 2018). However, ZAP fails to inhibit a diverse range of other  
94 RNA viruses including vesicular stomatitis virus (VSV), poliovirus (Bick *et al.*, 2003), influenza A  
95 virus (Liu *et al*, 2015; Tang *et al*, 2017), or enterovirus A71 (Xie *et al*, 2018). The involvement of  
96 ZAP in the defence against DNA viruses has not been explored to the same extent as for RNA  
97 viruses. While ectopic expression of ZAP failed to inhibit growth of the  $\alpha$ -herpesvirus herpes

98 simplex virus type 1 (HSV-1) (Bick *et al.*, 2003), ZAP could restrict HCMV by an unknown  
99 mechanism (Lin *et al.*, 2020). Interestingly, a luciferase-based reporter assay identified the HSV-1  
100 UL41 protein, known for its ability to mediate degradation of several mRNAs, as a ZAP antagonist  
101 that degrades ZAP mRNA, which may explain why ZAP cannot restrict HSV-1 (Bick *et al.*, 2003; Su  
102 *et al.*, 2015). Modified vaccinia virus Ankara (MVA) was recently shown to be restricted by ZAP, and  
103 while the knockout of ZAP had no discernible effect on viral DNA, individual mRNA or protein  
104 species, an interference of ZAP with a late step in the assembly of infectious MVA virions was  
105 suggested (Peng *et al.*, 2020).

106 To date, the RNA motif that is recognised by ZAP is still controversial. Early publications suggest an  
107 RNA structure-dependent recognition, based on the RNA tertiary structure, but already advocating  
108 the importance of the sequence-specific interaction between ZAP and its target RNA (Huang *et al.*,  
109 2010). The formation of tertiary structures raises the possibility of multiple binding sites.  
110 Subsequent studies support the recognition of CG-rich dinucleotide regions (Takata *et al.*, 2017).  
111 Indeed, a recent study revealed on a structural level that ZAP binds to CG-rich RNA with high  
112 affinity through its basic second zinc finger, which contains a pocket capable of accommodating  
113 CG-dinucleotide bases (Meagher *et al.*, 2019). However, another possibility is the binding of ZAP to  
114 AU-dinucleotides. Although one study claimed that ZAP does not recognise any of the three types  
115 of AU-rich elements (AREs) and concluded that ZAP may modulate stability of non-ARE-containing  
116 mRNAs (Guo *et al.*, 2004), recent publications described ZAP target specificity for sequences  
117 enriched for AU-rich dinucleotides (Odon *et al.*, 2019; Schwerk *et al.*, 2019). Taken together, while  
118 there is solid data indicating ZAP recognition of CG-dinucleotide containing RNA, it is feasible that  
119 the presence of several other zinc finger motifs in the ZAP protein broadens its target specificity.  
120 How these target specificities are regulated and the mechanism of how ZAP-bound RNA is  
121 degraded warrants further investigation.

122 Here, we report that the expression of the ZAP-S and ZAP-L isoforms is induced upon infection and  
123 that both act as restriction factors for HCMV in human primary fibroblasts (HFF-1). Further, a

124 combination of transcriptomics and proteomics demonstrates that ZAP restricts the progression of  
125 HCMV gene expression. Employing metabolic RNA labelling (SLAM-sequencing), we show that  
126 ZAP specifically affects the stability of distinct viral transcripts with low CG-content, namely  
127 transcripts of the RL11 gene family and the *UL144* gene, that are expressed with immediate-early to  
128 early kinetics of the viral life cycle. Altogether, we provide evidence that ZAP is an important cellular  
129 factor that restricts HCMV by a distinct manner.

130 **Results**

131

132 **Expression of ZAP is induced upon HCMV infection**

133 A previous proteomics study showed that HCMV infection of human fibroblasts (HFF-1) leads to the  
134 upregulation of a specific set of host proteins in the first 24 hours, including some ISGs. One of  
135 these ISGs was the antiviral protein ZAP (Weekes *et al*, 2014). The two major isoforms of ZAP, the  
136 short (ZAP-S) and the long (ZAP-L), are only differentiated by the inclusion of the C-terminal PARP  
137 domain in ZAP-L (Figure 1A). To analyse which of the two major isoforms of ZAP is induced upon  
138 HCMV infection, HFF-1 cells were infected with HCMV or, as control, stimulated with recombinant  
139 IFN $\beta$ , and expression of ZAP was analysed by immunoblotting. Our results show that ZAP-L was  
140 expressed in uninfected HFF-1 cells, and its expression was only marginally increased upon HCMV  
141 infection or IFN $\beta$  24 hours post stimulation (Figure 1B). In contrast, ZAP-S was barely expressed in  
142 untreated cells, but its expression was strongly induced by HCMV infection and IFN $\beta$  treatment  
143 (Figure 1B). These results show that ZAP-S is a prototypical ISG, which is strongly induced upon  
144 HCMV infection, whereas ZAP-L is already expressed prior to, and only slightly induced with,  
145 infection.

146 To investigate whether ZAP can shape the course of HCMV infection, we generated three individual  
147 ZAP-deficient HFF-1 cell lines by Cas9-mediated gene editing. Each cell line was generated using a  
148 different guide RNA, all targeting the first exon of *Zc3hav1*, and thereby affecting both ZAP-L and  
149 ZAP-S expression (Figure 1C). To verify the efficacy of genome editing, we infected the knockout  
150 cell lines with HCMV and analysed ZAP expression at 24, 48, and 72 hours post infection (hpi).  
151 Protein levels of both ZAP-L and ZAP-S were strongly reduced in all three knockout cell lines (g1,  
152 g2, g3), confirming successful genome editing (Figure 1D). As a control, we also generated a cell  
153 line with a non-targeting guide RNA. Expression of ZAP followed the same kinetics in both wild-type  
154 (WT) and control HFF-1 cells, demonstrating that stable expression of Cas9 did not affect ZAP  
155 expression kinetics (Figure 1E). To pinpoint when ZAP-S expression begins to increase after HCMV



156 infection, we monitored ZAP-L and ZAP-S protein levels in WT and control cells at earlier time  
157 points (2–10 hpi). Expression levels of ZAP-S were detectable around 6 to 8 hours post HCMV  
158 infection and steadily increased over time (Figure 1F).

159 Taken together, these results show that HCMV infection leads to a strong and steady increase of  
160 ZAP-S levels, while ZAP-L is already expressed in uninfected cells but also further induced upon  
161 infection and overall stable over a complete cycle of HCMV replication.

162

### 163 **Both ZAP-S and ZAP-L negatively affect HCMV genome replication**

164 To investigate the impact of ZAP on HCMV replication, WT, control, or ZAP KO HFF-1 cells were  
165 infected with HCMV and viral genome copies were quantified by qPCR at 1, 3, and 5 days post  
166 infection (dpi) (Figure 2A). We included day 1 of infection in our analysis to verify that the knockout  
167 of ZAP is not affecting viral entry and that the different cell lines were infected to a similar extent.  
168 Indeed, at this early time point when HCMV has not entered the first round of viral genome  
169 replication, no significant differences in the number of HCMV genome copies were detected (Figure  
170 2B). At day 3 post infection, when HCMV has completed its first replication cycle, WT and control  
171 cells showed significantly lower numbers of viral genome copies compared to ZAP KO cells. At 5  
172 days post infection, HCMV genome copy numbers in WT and control cells were still 5 times lower  
173 than in ZAP KO cells (Figure 2B). These results suggest that HCMV genome replication is  
174 negatively affected by ZAP-S, ZAP-L, or both.

175 Next, we sought to elucidate which of the two major isoforms contributes to the restriction of HCMV  
176 replication. To address this, we reconstituted ZAP KO cells by lentiviral transduction with either an  
177 empty vector control, or C-terminally myc-tagged forms of ZAP-S or ZAP-L (Figure 2C). Both ZAP  
178 isoforms were codon optimised to avoid recognition and cleavage by the stably expressed gRNA  
179 and Cas9 within the KO cell lines. Protein levels of both codon-optimised and WT isoforms were  
180 comparable when expressed in HEK 293T cells. Thus, codon optimisation of the ZAP-S or ZAP-L  
181 gene did not negatively affect protein expression (Figure EV1). Upon stable expression in ZAP KO

182 HFF-1 cells, both ZAP-S and ZAP-L localised to the cytoplasm under both uninfected and infected  
183 conditions (Figure 2D). Next, the reconstituted ZAP KO cells were infected with HCMV and genome  
184 copy numbers were analysed as described above (Figure 2A). Strikingly, reconstitution with either  
185 ZAP-S (Figure 2E) or ZAP-L (Figure 2F) in ZAP KO cells rescued the phenotype. While HCMV  
186 genome copy numbers were equal in infected WT and ZAP-S or ZAP-L reconstituted cells, ZAP KO  
187 cells showed significantly higher viral copy numbers. These results show that both ZAP-S and  
188 ZAP-L negatively affect HCMV genome replication.

189

### 190 **ZAP negatively affects global expression of early and late HCMV proteins**

191 Given the negative impact of ZAP on HCMV genome replication, we next examined the time course  
192 of HCMV infection in the presence or absence of ZAP. Expression of HCMV genes follows a  
193 temporal cascade, which begins with the transcription of immediate-early (IE) genes, with the  
194 translation of IE proteins starting approximately 6 hours post infection (hpi). IE proteins  
195 subsequently transactivate the transcription of early (E) genes, which are mainly involved in viral  
196 DNA replication. Early proteins are produced approximately 18-20 hpi and together with a third  
197 classical cluster of the so called early-late (E-L) proteins at 48 hpi will mediate the transcription of  
198 late (L) genes which code mainly for viral capsid, envelope and tegument components at 72 to 96  
199 hpi (Stinski, 1978; Wathen & Stinski, 1982; Weekes *et al.*, 2014). When we monitored the  
200 expression levels of the early viral protein UL44 and the late viral protein UL83 in HCMV infected  
201 WT and the three ZAP KO cell lines, we observed elevated protein levels of UL44 and UL83 in the  
202 absence of ZAP. This suggests that the presence of ZAP negatively affects viral protein expression  
203 (Figure 3A), which is in line with our analysis of HCMV genome replication (Figure 2B).

204 To obtain a global overview of the progression of HCMV infection, we performed whole proteome  
205 analyses of WT and ZAP KO HFF-1 cells using liquid chromatography with tandem mass  
206 spectrometry (LC-MS/MS) (Table 1). We mock treated or infected WT and ZAP KO HFF-1 cells with  
207 HCMV for 48 and 72 hours, thus covering the early-late proteome landscape of viral gene

208 expression. Overall, we observed significantly higher viral protein levels in ZAP KO cells compared  
209 to WT cells (Figure 3B). In line with our previous observations (Figure 3A), we detected significantly  
210 higher levels of UL44 and UL83 protein in ZAP KO cells (Figure 3C). UL44, considered an early  
211 protein, is already expressed at 48 hours, while UL83 protein levels are only increasing at 72 hpi  
212 consistent with the kinetics of L gene expression. In line with these observations, the proteome  
213 analysis showed other viral proteins that were significantly upregulated in the absence of ZAP. For  
214 instance, we detected increased expression of UL84 at 48 hpi, an early protein involved in viral DNA  
215 replication (Figure 3D), as well as elevated levels of the late proteins UL103 and UL104 at 72 hpi,  
216 similar to UL83 and corresponding to late kinetics (Figure 3E).

217 Next, we performed reconstitution assays with ZAP-S and ZAP-L as described above (Figure 2C)  
218 and analysed UL44 protein expression by immunoblotting (Figure 3F-G). Similar to our analysis of  
219 HCMV genome replication, UL44 protein levels in ZAP KO cells reconstituted with either ZAP-S  
220 (Figure 3F) or ZAP-L (Figure 3G) were lower than in the absence of ZAP, and comparable to those  
221 in WT cells.

222 Taken together, these results demonstrate that the presence of both main ZAP isoforms negatively  
223 affects HCMV protein levels at early and late stages of infection.

224

### 225 **ZAP-S and ZAP-L have a negative impact on early and late HCMV transcripts**

226 Previous studies showed that ZAP directly binds to RNA (Guo *et al.*, 2004) and subsequently  
227 mediates its degradation by recruiting both the 5' and 3' RNA degradation machinery (Guo *et al.*,  
228 2007; Zhu *et al.*, 2011). To decipher whether ZAP affects HCMV mRNA expression, we analysed  
229 mRNA levels of the early *UL44* and the late *UL83* transcripts at different stages of the HCMV  
230 infection cycle by qRT-PCR in WT and ZAP KO cells. Indeed, in the presence of ZAP, *UL44* and  
231 *UL83* mRNA levels were lower (Figure 4A). These results mirror our protein analyses and suggest  
232 that ZAP may negatively influence these transcripts by either affecting their expression, stability, or  
233 by other, indirect effects. Congruent with our analysis of HCMV protein expression (Figure 3),

234 reconstitution of ZAP KO cells with either ZAP-S or ZAP-L resulted in the rescue of this phenotype  
235 ([Figure 4B](#)).

236 Taken together, these results suggest that both ZAP isoforms, ZAP-S and ZAP-L, negatively  
237 regulate HCMV mRNA expression.

238

### 239 **ZAP affects stability of early, but not late, HCMV transcripts**

240 Since ZAP was previously described to be involved in mRNA degradation, we studied cellular and  
241 viral mRNA stability during HCMV infection of WT and ZAP KO cells. For this, we labelled newly  
242 synthesised RNA from 17h-18h and from 71h-72h post infection using 4-thiouridine (4sU) and  
243 performed SLAM-seq (thiol-linked alkylation for the metabolic sequencing of RNA) (Herzog *et al*,  
244 2017). Then, we identified the newly synthesised and total RNA using the computational approach  
245 GRAND-SLAM (termed Globally refined analysis of newly transcribed RNA and decay rates using  
246 SLAM-seq) (Jurges *et al*, 2018) ([Figure 5A](#), [Table 2](#)). In agreement with previous studies, we  
247 confirmed that *TNFRSF10D* total mRNA was significantly upregulated in uninfected ZAP KO cells,  
248 but also expressed higher in the context of HCMV infection ([Figure 5B](#)). *TNFRSF10D* encodes for  
249 the pro-survival protein TRAIL receptor 4 (TRAILR4, a human cell surface receptor of the  
250 TNF-receptor superfamily) and was previously described to be targeted by ZAP at the mRNA level  
251 (Todorova *et al*, 2014). Notably, we found another, previously undescribed, anti-apoptotic factor  
252 which was significantly upregulated in ZAP KO cells compared to WT cells, *ZMAT3* (encoding for  
253 the zinc finger matrin-type protein 3, also known as zinc finger protein Wig-1), with a more  
254 pronounced upregulation in the context of HCMV infection ([Figure 5B](#), [EV2](#)). For both *TNFRSF10D*  
255 and *ZMAT3*, reconstitution with either ZAP-S or ZAP-L rescued these phenotypes as shown by  
256 qRT-PCR analyses ([Figure EV2](#)). The SLAM-seq results revealed that the upregulation in ZAP KO  
257 cells of these two cellular mRNAs in total RNA was not paralleled by the transcription of newly  
258 synthesised RNA, where levels were equal between WT and ZAP KO cells ([Figure 5B](#)). This shows

259 that in the absence of ZAP, these transcripts have a longer half-life, and indicates that ZAP has an  
260 impact on their degradation, but not on their transcription.

261 Regarding viral mRNA transcripts, we observed a 4–12-fold up-regulation of viral genes in ZAP KO  
262 cells on both total RNA as well as newly synthesised RNA levels at 72 hpi (Figure 5C). These  
263 results indicate that the upregulation on total RNA levels in ZAP KO cells at late times of HCMV  
264 infection is predominantly due to increased transcription rates, and not due to an increase in mRNA  
265 stability.

266 Strikingly, at 18 hpi, we identified a subset of viral genes with significantly increased total transcript  
267 levels in ZAP KO cells, *UL4*, *UL5*, *UL6*, *RL12*, *RL13*, and *UL144*, which did not correlate with  
268 increased *de novo* RNA transcription (Figure 5C), indicating their longer mRNA stability in the  
269 absence of ZAP.

270 In summary, while ZAP does not affect the stability of the majority of viral transcripts, it specifically  
271 affects stability of a distinct set of HCMV mRNA transcripts early in infection.

272

### 273 **HCMV infection progresses faster in the absence of ZAP**

274 In order to understand the effect of ZAP on the viral gene expression cascade over time, we  
275 analysed the whole transcriptome landscape during HCMV infection by RNA-sequencing  
276 (RNA-seq) in WT, control cells, and two independent ZAP KO cell lines (g1 and g3 ZAP KO) (Figure  
277 5D, Table 3). First, we observed that HCMV infection leads to a robust and overall similar induction  
278 of ISGs in all cell lines analysed, indicating that the absence of ZAP does not affect the  
279 PRR-mediated host response during HCMV infection (Figure EV3). For analysis of the temporal  
280 progression of HCMV gene expression, we focused on the mRNA abundance per time point post  
281 infection relative to the abundance over all time points. Based on these relative temporal gene  
282 expression values in WT cells, genes were clustered into nine groups grouped from  
283 immediate-early to late expression, broadly corresponding to a previously published classification  
284 (Weekes *et al.*, 2014) (Figure 5D, EV4). To simplify the temporal distribution of the viral genes,

285 average relative expression levels of the genes within the clusters were calculated and depicted as  
286 a heat map (Figure 5D). Strikingly, the temporal expression patterns of most clusters were shifted to  
287 earlier time points in both ZAP KO cell lines, compared to WT and control cells. We observed  
288 different subsets of viral genes whose expression was detected earlier in ZAP KO cells compared to  
289 WT cells. For instance, ZAP KO cells showed high expression levels of *UL138* or long non-coding  
290 *RNA 2.7* (Figure EV4). Notably, these viral transcripts have been previously identified in several  
291 studies in relation to the latent cycle of HCMV (Goodrum *et al*, 2007; Rossetto *et al*, 2013;  
292 Umashankar *et al*, 2011), a concept that is currently changing and can increasingly be associated  
293 with a late-lytic replication programme (Shnayder *et al*, 2018). Differential regulation of the HCMV  
294 transcripts *UL4*, *UL5*, *UL6*, *RL12*, *RL13*, and *UL144* identified by SLAM-seq (Figure 5C) was  
295 confirmed by RNA-seq, from which selected exemplified transcripts are shown (Figure 5D, lower  
296 panel).

297 In conclusion, ZAP KO cells show an accelerated course of HCMV infection and seem to more  
298 rapidly achieve an intracellular environment associated with a late-lytic gene expression  
299 programme. These results, in line with our previous findings for viral protein levels, indicate that  
300 ZAP delays the progression of the HCMV replication cycle, as reflected in the decelerated course of  
301 the viral gene expression cascade.

302

### 303 **ZAP negatively affects a subset of early HCMV transcripts that exhibit CG suppression**

304 Previous studies indicated that ZAP favours CG-dinucleotide enriched RNA sequences and  
305 mediates their degradation (Meagher *et al.*, 2019; Takata *et al.*, 2017). Thus, we compared the CG  
306 levels of different viral transcripts to determine whether the HCMV transcripts affected by ZAP are  
307 enriched in CG content (Figure 5E). Remarkably, most of the viral transcripts that were significantly  
308 upregulated in ZAP KO cells and also showed elevated mRNA stability (Figure 5C-D) exhibit a low  
309 CG content that is comparable to that of human genes: *UL4*, *UL5*, *UL6*, *RL12*, *RL13*, and *UL144*  
310 (Figure 5E). On the contrary, the early *UL44* and the late *UL83* transcripts, whose stability was not

311 affected by ZAP (Figure 5C), have a high CG content (Figure 5E). These results suggest that ZAP  
312 may recognise motifs in HCMV transcripts other than CG-dinucleotides.  
313 Taken together, our findings indicate that ZAP may restrict HCMV replication by downregulating the  
314 expression of a subset of viral genes with low CG content early during HCMV infection, thus  
315 delaying progression of the HCMV infection cycle.

316 **Discussion**

317

318 Viral infection induces a virus species specific expression pattern of interferon-stimulated genes  
319 (Schoggins *et al*, 2011). To date, more than 300 ISGs have been described, but so far, the function  
320 of the majority of the proteins they encode for is poorly understood. ISG function is highly contextual  
321 as their effect on viral infection is dependent on the viral entry route, replication mechanism, site of  
322 replication and viral assembly, and cell type. Hence, while some ISGs may exert an antiviral activity  
323 against some viruses, they may either have a neutral or positive effect on other viruses, or in some  
324 instances, be susceptible to viral evasion mechanisms (Gonzalez-Perez *et al.*, 2020; Schoggins *et*  
325 *al.*, 2014).

326 HCMV infection leads to the upregulation of a distinct set of cellular proteins during the first 24  
327 hours of infection; 32 of these were classified as ISGs, among them the RNA binding ZAP protein  
328 (Weekes *et al.*, 2014). While that report did not distinguish between the two major ZAP isoforms  
329 ZAP-S and ZAP-L, in this study we delineated their endogenous expression kinetics during HCMV  
330 infection. ZAP-L is readily detectable in uninfected cells and its expression slightly increases  
331 throughout the first 48 hours of HCMV infection, while ZAP-S protein levels are low in uninfected  
332 cells and strongly upregulated from 6 hours post infection onwards. At a late stage of the HCMV life  
333 cycle, expression of both ZAP isoforms decreases, which likely reflects the fading type I IFN  
334 response rather than HCMV-mediated degradation (Nobre *et al*, 2019; Weekes *et al.*, 2014).

335 Reconstitution of ZAP KO cells with either ZAP-S or ZAP-L showed that both have the potential to  
336 restrict HCMV replication to similar levels as endogenous ZAP in wild-type cells. In the course of  
337 completing our manuscript, a study was published that reported a negative effect of ZAP on HCMV  
338 (Lin *et al.*, 2020). The authors analysed expression of four HCMV proteins of three temporal  
339 classes, the immediate early proteins 1 (IE1) and 2 (IE2), the early protein UL44 and the late protein  
340 UL99. Protein levels of IE2, UL44 and UL99 were reduced in the presence of ZAP, but not that of  
341 IE1 (Lin *et al.*, 2020). Since ZAP has previously been associated with the binding of CG-rich RNA



342 sequences (Chiu *et al.*, 2018; Odon *et al.*, 2019; Takata *et al.*, 2017), the authors concluded based  
343 on a bioinformatics analysis of the CG content of HCMV genes that the low CG content of the *IE1*  
344 gene could be an HCMV evasion mechanism to avoid ZAP recognition (Lin *et al.*, 2020). While the  
345 conclusion drawn by Lin *et al.* (2020) is reasonably supported by their data, the impact of ZAP was  
346 only elucidated on four HCMV proteins, without analysing their transcript levels or mRNA stability.  
347 Our study took a global approach and examined the whole transcriptome and proteome during  
348 HCMV infection in WT and ZAP KO cells. We did not observe an effect of ZAP on total *IE1*  
349 transcript levels, confirming the protein expression results by Lin *et al.* (2020). Indeed, we could  
350 pinpoint that ZAP strongly delays transcription of the majority of viral genes which consequently  
351 results in the delay of viral protein expression.

352 We reveal, by SLAM-seq, that six HCMV transcripts, namely *UL4*, *UL5*, *UL6*, *RL12*, *RL13*, and  
353 *UL144*, have longer half-lives in the absence of ZAP at early times of HCMV infection (18-24 hpi),  
354 indicating that these transcripts are destabilised in the presence of ZAP. *UL4*, *UL5*, *UL6*, *RL12*, and  
355 *RL13* belong to the RL11 family (Chee *et al.*, 1990; Davison *et al.*, 2003b). The biological function of  
356 the RL11 family members is only poorly understood, but several studies suggest that these  
357 membrane-associated proteins may be involved in immune evasion (Atalay *et al.*, 2002;  
358 Corrales-Aguilar *et al.*, 2014; Cortese *et al.*, 2012; Davison *et al.*, 2003a; Lilley *et al.*, 2001). They are  
359 largely dispensable for virus growth in cultured fibroblasts, which is often the case for viral proteins  
360 involved in immune evasion (Ripalti & Mocarski, 1991; Takekoshi *et al.*, 1991). Further, RL13 was  
361 described to restrict HCMV growth *in vitro* by an unknown mechanism (Murrell *et al.*, 2016; Stanton  
362 *et al.*, 2010).

363 The UL144 transmembrane protein has likewise been connected to immune evasion. UL144 is a  
364 structural mimic of the tumor necrosis factor receptor superfamily member 14 (TNFRSF14, also  
365 known as HVEM for herpesvirus entry mediator) (Benedict *et al.*, 1999; Bitra *et al.*, 2019;  
366 Montgomery *et al.*, 1996) and is expressed early in lytic infection and during natural latency in  
367 CD14+ monocytes (Benedict *et al.*, 1999; Poole *et al.*, 2013). Moreover, UL144 is highly variable in

368 sequence between clinical HCMV isolates and some studies reported that certain genotypes can be  
369 associated with severe disease outcomes (Benedict *et al.*, 1999; Galitska *et al.*, 2018; Lurain *et al.*,  
370 1999; Waters *et al.*, 2010). Its multiple functional consequences on T cell and NK cell-mediated  
371 antiviral immunity (Cheung *et al.*, 2005; Poole *et al.*, 2008; Poole *et al.*, 2009; Poole *et al.*, 2006; Šedý  
372 *et al.*, 2013) indicate that UL144 likely plays multiple roles in regulating immunity to HCMV infection  
373 during lytic and latent phases of the viral life cycle.

374 We cannot definitively conclude from our study that the reduced expression of one of these HCMV  
375 transcripts or the combination of them is directly responsible for the delayed progression of HCMV  
376 infection in ZAP-expressing cells, but given that their function is either poorly understood (RL11  
377 family) or multifactorial (UL144), it can be a plausible explanation. Another possibility is that we are  
378 observing two different phenomena in this study: that ZAP on the one hand negatively affects mRNA  
379 stability of this specific set of immune evasins, and on the other hand delays viral transcription,  
380 presumably in an indirect manner, resulting in reduced viral fitness (Teng *et al.*, 2012). Since the  
381 function of these immune evasins will be more apparent *in vivo* than *in vitro*, the overall impact of  
382 ZAP on HCMV infection can only be fully understood in the clinical setting. This unknown can be  
383 addressed, for example, through an analysis of whether specific SNP patterns in ZAP can be  
384 predictive of the outcome of HCMV disease.

385 In addition to viral mRNA transcripts, ZAP has also been described to mediate degradation of  
386 specific cellular transcripts (Schwerk *et al.*, 2019; Todorova *et al.*, 2014). Indeed, we identified two  
387 human transcripts whose stability was influenced by ZAP, *TNFRSF10D*, encoding the TRAIL  
388 receptor 4 (TRAILR4), and *ZMAT3*, encoding the zinc finger matrix-type protein 3 (also known as  
389 zinc finger protein Wig-1). A negative effect of ZAP on *TNFRSF10D* mRNA stability was previously  
390 reported, resulting in increased cell sensitivity to TRAIL-mediated apoptosis (Todorova *et al.*, 2014).  
391 Interestingly, Wig-1 is also a pro-survival factor (Bersani *et al.*, 2014).

392 Altogether, our results demonstrate that ZAP specifically targets host cell transcripts involved in cell  
393 survival, as well as a distinct set of HCMV transcripts involved in immune evasion. This raises the

394 question of how ZAP influences mRNA stability of these transcripts - does it bind them directly and  
395 mediate their degradation, or does ZAP influence them in an indirect manner? Several studies  
396 describe the importance of CG-rich sequences for binding of ZAP to RNA, which eventually leads to  
397 the degradation of this RNA (Chiu *et al.*, 2018; Luo *et al.*, 2020; Meagher *et al.*, 2019; Odon *et al.*,  
398 2019; Takata *et al.*, 2017). In comparison to the human genome, which has low CG content  
399 (Antequera & Bird, 1993; Bestor & Coxon, 1993), the HCMV genome presents the highest CG  
400 content among human *Betaherpesvirinae* (Sharma *et al.*, 2016), which makes HCMV transcripts a  
401 good target for ZAP-mediated degradation. However, in our study, the HCMV transcripts whose  
402 stability was affected by ZAP display low CG content, while the stability of HCMV transcripts with  
403 high CG content such as *UL44* or *UL83* and the majority of other viral transcripts were not affected.  
404 In addition, ZAP also targets host mRNAs with low CG content. Hence, we propose that ZAP may  
405 bind transcripts via motifs other than CG-rich sequences, e.g. AU-rich elements, which can be  
406 bound by ZAP (Odon *et al.*, 2019; Schwerk *et al.*, 2019), or via more specific motifs that have yet to  
407 be identified. CLIP-seq assays are challenging to perform in the context of infection, but are a  
408 desirable approach to prove direct interaction between ZAP and viral transcripts.

409 While both ZAP isoforms, ZAP-S and ZAP-L, could restrict HCMV infection in our study, recent  
410 studies propose diverse functions for one or the other isoform during infection with different viruses.  
411 This is the case for Sindbis virus (SINV), an RNA alphavirus previously shown to be inhibited by  
412 ZAP (Bick *et al.*, 2003; Schwerk *et al.*, 2019), and the DNA virus Modified Vaccinia Virus Ankara  
413 (MVA) (Peng *et al.*, 2020). Schwerk and colleagues observed that ZAP-L, which can be  
414 farnesylated at its C-terminus (which is lacking in ZAP-S) and thereby be targeted to membranes  
415 (Charron *et al.*, 2013), colocalises with SINV RNA intermediates in distinct foci in the cytoplasm  
416 (Schwerk *et al.*, 2019). Similarly, for MVA, which also replicates in the cytoplasm, no impact of ZAP  
417 on viral transcription was observed, but rather an effect of ZAP-L on viral assembly (Peng *et al.*,  
418 2020). Nonetheless, for HCMV, which replicates its DNA genome in the nucleus, we did not  
419 observe distinct foci in ZAP-L expressing cells, but a similar diffuse cytoplasmic localisation for both

420 ZAP-L and ZAP-S in uninfected and infected HFF-1 cells. Hence, in the case of the DNA virus  
421 HCMV, ZAP-L and ZAP-S may exert redundant functions, both targeting mRNAs localised in the  
422 cytoplasm. Interestingly, ZAP-S was described to act as a negative feedback regulator of the IFN  
423 response later in infection with SINV by destabilising the IFN $\beta$  transcript (Schwerk *et al.*, 2019).  
424 However, we did not observe an effect for ZAP-S on IFN signalling pathways, which likely  
425 corresponds with HCMV encoding multiple viral evasion proteins that downmodulate the IFN  
426 response (Gonzalez-Perez *et al.*, 2020; Stempel *et al.*, 2019). Hence, a possible effect of ZAP-S in  
427 this regard may be overshadowed in the context of infection with this complex herpesvirus.  
428 Altogether, these findings show the multiple layers of complexity of this RNA binding protein,  
429 highlighting its different facets depending on the virus species it encounters. For HCMV, ZAP  
430 appears on the scene at early time points of infection, decelerating the viral gene expression  
431 cascade, and handpicks for degradation a distinct set of viral transcripts encoding for viral immune  
432 evasins, illustrating its potent role as an antiviral restriction factor for this complex herpesvirus.

433 **Materials and methods**

434

435 **Cell lines**

436 Primary human foreskin fibroblasts (HFF-1; SCRC-1041), MRC-5 (CCL-171) and human embryonic  
437 kidney 293T cells (HEK 293T; CRL-3216) were obtained from ATCC. HEK 293T and MRC-5 cells  
438 were maintained in Dulbecco's modified Eagle's medium (DMEM; high glucose) supplemented with  
439 8% fetal calf serum (FCS), 2 mM glutamine (Gln), and 1% penicillin/streptomycin (P/S). HFF-1 cells  
440 were maintained in DMEM (high glucose) supplemented with 15% FCS, 1% P/S and 1% non-  
441 essential amino acids (NEAA). Cells were cultured at 37°C and 7.5% CO<sub>2</sub>.

442

443 **Viruses**

444 The wild-type HCMV TB40-BAC4 (hereinafter designated as HCMV WT) was characterised  
445 previously (Sinzger *et al.*, 2008) and kindly provided by Martin Messerle (Institute of Virology,  
446 Hannover Medical School, Germany). HCMV BACs were reconstituted after transfection of MRC5  
447 cells with purified BAC DNA. Reconstituted virus was propagated in HFF-1 cells and virus was  
448 purified on a 10% Nycodenz cushion. The resulting virus pellets were resuspended in virus  
449 standard buffer (50 mM Tris-HCl pH 7.8, 12 mM KCl, 5 mM EDTA) and stored at -70°C. Infectious  
450 titre was determined by standard plaque assay and IE1 labelling using HFF-1.

451

452 **Plasmids**

453 Expression plasmids for Firefly Luciferase (FFLuc, control) and ZAP-S (short isoform of ZAP) in  
454 pTRIP-IRES-RFP as well as pCMV-VSV-G and pCMV-gag/pol plasmids were described previously  
455 (Schoggins *et al.*, 2011) and kindly provided by John Schoggins (University of Texas Southwestern  
456 Medical Center, Dallas, Texas). pcDNA4-HA-ZAP-L (long isoform of ZAP) (Kerns *et al.*, 2008) was  
457 kindly provided by Chad Swanson (Department of Infectious Diseases, School of Immunology and  
458 Microbial Sciences, King's College London). ZAP-S and ZAP-L were subcloned into pEF1-V5/His

459 (Thermo Fisher Scientific) via the *KpnI/XbaI* sites to generate pEF1-ZAP-S-V5/His and  
460 pEF1-ZAP-L-V5/His, respectively. Exchange of V5/His to myc/His was performed using the Q5  
461 site-directed mutagenesis kit (NEB #E0554) according to the manufacturer's protocol resulting in  
462 pEF1-ZAP-S-myc/His and pEF1-ZAP-L-myc/His. In order to reconstitute ZAP-S and ZAP-L  
463 expression in ZAP KO cell lines, codon optimisation of the ZAP-S and ZAP-L coding region was  
464 performed to prevent binding of the constitutively expressed gRNA and Cas9. For this, nucleotides  
465 103-219 of the ZAP-S and ZAP-L coding region (spanning across the binding sites for gRNA 1 and  
466 gRNA 3, see [Figure 1C](#)) were codon optimised using the Q5 site-directed mutagenesis kit, resulting  
467 in pEF1-ZAP-S-myc/His and pEF1-ZAP-L-myc/His codon-optimised. A pTRIP-IRES-RFP empty  
468 vector was generated by replacing the coding region of ZAP-S from pTRIP-IRES-RFP ZAP-S  
469 (received from John Schoggins) by the multiple cloning site of pWPI vectors to obtain *PmeI*, *SdaI*,  
470 *SgsI*, *BamHI*, *XmaI*, *RgaI* and *XhoI* restriction sites for further subcloning. Codon-optimised  
471 versions of ZAP-S and ZAP-L were subcloned into the newly generated pTRIP-IRES-RFP empty  
472 vector via the *SgsI/BamHI* restriction sites to generate pTRIP-IRES-RFP ZAP-S-opt-myc/His and  
473 pTRIP-IRES-RFP ZAP-L-opt-myc/His. All constructs were verified by sequencing. Oligo sequences  
474 as well as sequences of all constructs are available upon request.

475 The expression plasmid for gRNA cloning and CRISPR/Cas9-mediated gene editing,  
476 pLK05.U6.sgRNA(BsmBI,stuff).EFS.SpCas9.P2A.tagRFP (Heckl *et al*, 2014), was kindly  
477 provided by Dirk Heckl (Experimental Pediatrics, Hannover Medical School, Germany). The  
478 corresponding envelope and packaging plasmids pMD2.G and psPAX2 were purchased from  
479 AddGene (#12259 and #12260, respectively).

480

#### 481 **Antibodies and reagents**

482 Mouse monoclonal anti-pp65 (#ab6503, clone 3A12) was obtained from Abcam and mouse  
483 monoclonal anti-ICP36 (anti-UL44) (#MBS530793, clone M612460) was purchased from  
484 MyBioSource. Mouse monoclonal anti-hZAP (ZC3HAV1) (#66413-1-Ig, clone 1G10B9) and rabbit

485 polyclonal anti-hZAP (#16820-1-AP) were obtained from Proteintech. Mouse monoclonal anti-actin  
486 (A5441, clone AC-15) was obtained from Sigma-Aldrich. Rabbit monoclonal anti-myc (#2278, clone  
487 71D10) was obtained from Cell Signaling. Mouse monoclonal anti-IE1 (clone 63-27, originally  
488 described in Andreoni *et al*, 1989) was a kind gift from Jens von Einem (Institute of Virology, Ulm  
489 University Medical Center, Ulm). Alexa Fluor<sup>®</sup>-conjugated secondary antibodies were purchased  
490 from Invitrogen. The transfection reagent Lipofectamine 2000 was purchased from Life  
491 Technologies, Polybrene was obtained from SantaCruz. OptiMEM was purchased from Thermo  
492 Fisher Scientific. Protease inhibitors (4693116001) were purchased from Roche. Recombinant  
493 human IFN $\beta$  was purchased from PeproTech (#300-02BC).

494

#### 495 **Generation of ZAP knockout cells using CRISPR/Cas9-mediated genome editing**

496 Custom gRNAs targeting the first exon of the ZAP coding region, thus disrupting expression of  
497 ZAP-S and ZAP-L, were designed using CRISPOR software (<http://crispor.tefor.net>) (Haeussler *et*  
498 *al*, 2016) and cloned into the lentiviral pLKO5 vector (kindly provided by Dirk Heckl,  
499 Martin-Luther-University in Halle, Germany). The pLKO5 vector constitutively expresses the  
500 introduced gRNA under the control of a U6 promoter. SpCas9 with a P2A cleavage site followed by  
501 RFP is under the control of the EF1 $\alpha$  short promoter and results in the constitutive expression of  
502 SpCas9 and an RFP reporter for cell sorting. Three different gRNAs targeting the ZAP coding  
503 region and a non-targeting control gRNA were generated and cloned into the pLKO5 vector via the  
504 *BsmBI* restriction site. ZAP gRNA 1 targets exon 1 at nucleotide 149, ZAP gRNA2 at nucleotide 53  
505 and ZAP gRNA3 at nucleotide 191. The gRNA sequences are as follows: ZAP-g1\_FOR:

506 5'-CACCGGCCGGCCCGACCGCTTTG; ZAP-g1\_REV:

507 5'-AAACCAAAGCGGTCGGGCCCGGCC; ZAP-g2\_FOR:

508 5'-CACCGCAAATCCTGTGCGCCACG; ZAP-g2\_REV:

509 5'-AAACCGTGGGCGCACAGGATTTTGC; ZAP-g3\_FOR:

510 5'-CACCGGCCGGGATCACCGATCGG; ZAP-g3\_REV:



511 5'-AAACCCGATCGGGTGATCCCGGCC; control-gRNA\_FOR:

512 5'-CACCGGATTCTAAAACGGATTACC; control-gRNA\_REV:

513 5'-AAACGGTAATCCGTTTTAGAATCC. For lentivirus production, HEK 293T cells (730,000 cells  
514 per well, 6-well format) were transfected with 400 ng pMD2.G, 1,600 ng psPAX2 and 2,000 ng  
515 pLKO5 plasmid (containing the respective gRNA) complexed with Lipofectamine. 16 hours post  
516 transfection, medium was changed to lentivirus harvest medium (DMEM h.gl. supplemented with  
517 20% FCS, 1% P/S and 10mM HEPES). 48 hours post transfection, lentivirus was harvested, diluted  
518 1:2 with HFF-1 medium, and polybrene was added to a final concentration of 4 µg/ml. HFF-1 cells  
519 were seeded the day before transduction in a 6-well format with 250,000 cells/well. For  
520 transduction, HFF-1 medium was replaced by medium containing lentivirus and cells were  
521 transduced by centrifugal enhancement at 684 x g and 30°C for 90 minutes. 3 hours post  
522 transduction, medium was replenished to fresh HFF-1 medium. Successfully transduced cells were  
523 sorted by flow cytometry for RFP signal 72 hours post transduction to obtain a cell population  
524 devoid of ZAP expression. Cas9-mediated knockout of ZAP was verified by immunoblot.

525

## 526 **Reconstitution assays**

527 For reconstitution of ZAP-S or ZAP-L expression in ZAP KO cell lines, lentiviral transduction was  
528 performed as described above. Briefly, 2,000 ng pTRIP-IRES-RFP empty vector or  
529 pTRIP-IRES-RFP containing codon-optimised C-terminally myc-tagged ZAP-S or ZAP-L together  
530 with 400 ng pCMV-VSV-G and 1,600 ng pCMV-gag/pol complexed with Lipofectamine were  
531 transfected into HEK 293T cells and medium was changed to lentivirus harvest medium the next  
532 day. 48 hours post transfection, WT or the indicated ZAP KO HFF-1 cells were lentivirally  
533 transduced. 72 hours post transduction, cells were counted and 100,000 cells per well were seeded  
534 in a 24-well format. The next day, cells were infected with HCMV WT at an MOI of 0.1 and infection  
535 was enhanced by centrifugation at 684 x g for 45 min at 30°C. After centrifugation, cells were  
536 incubated at 37°C for 30 min followed by replacement of virus-containing medium with fresh HFF-1



537 medium. At indicated time points post infection, cells were lysed for analysis by immunoblot or  
538 qRT-PCR as described below.

539

#### 540 **Immunoblotting**

541 For the analysis of viral protein kinetics upon HCMV infection, HFF-1 WT or ZAP KD cells  
542 (100,000 cells/well in a 24-well format) were infected with HCMV WT at an MOI of 0.1 and the  
543 infection was enhanced by centrifugation at 684 x g at 30°C for 45 min. The moment when the virus  
544 was added to the cells was defined as time point 0. After centrifugation, cells were incubated at  
545 37°C for 30 minutes followed by replacement of virus-containing medium with fresh HFF-1 medium.  
546 Cells were lysed at indicated time points using radioimmunoprecipitation (RIPA) buffer (20 mM  
547 Tris-HCl pH 7.5, 1 mM EDTA, 100 mM NaCl, 1% Triton X-100, 0.5% sodium deoxycholate, 0.1%  
548 SDS). Protease inhibitors were added freshly to all lysis buffers prior to use. Cell lysates and  
549 samples were separated by SDS-PAGE and transferred to PVDF membrane (GE Healthcare)  
550 using wet transfer and Towbin blotting buffer (25 mM Tris, 192 mM glycine, 20% (v/v) methanol).  
551 Membranes were probed with the indicated primary antibodies and respective secondary HRP-  
552 coupled antibodies diluted in 5% w/v non-fat dry milk or 5% BSA in TBS-T. Immunoblots were  
553 developed using SuperSignal West Pico (Thermo Fisher Scientific) chemiluminescence substrates.  
554 Membranes were imaged with a ChemoStar ECL Imager (INTAS) and quantified using the  
555 LabImage 1D software (INTAS).

556

#### 557 **Immunofluorescence**

558 ZAP KO HFF-1 cells were lentivirally transduced as described above. Briefly, 2,000 ng  
559 pTRIP-IRES-RFP containing codon-optimised C-terminally myc-tagged ZAP-S or ZAP-L together  
560 with 400 ng pCMV-VSV-G and 1,600 ng pCMV-gag/pol complexed with Lipofectamine were  
561 transfected into HEK 293T cells and medium was changed to lentivirus harvest medium the next  
562 day. 48 hours post transfection, ZAP KO HFF-1 cells were lentivirally transduced. 72 hours post

563 transduction, cells were counted and 20,000 cells per well were seeded in a  $\mu$ -Slide 8 Well (ibidi  
564 #80826). The next day, cells were mock infected or infected with HCMV WT at an MOI of 0.1 and  
565 infection was enhanced by centrifugation at 684 x g for 45 min at 30°C. After centrifugation, cells  
566 were incubated at 37°C for 30 min followed by replacement of virus-containing medium with fresh  
567 HFF-1 medium. Cells were fixed 24 hpi using 4% PFA in PBS for 20 min at room temperature. Cells  
568 were washed three times with PBS, followed by permeabilization using 0.4% Triton X-100 in PBS  
569 for 10 min at room temperature. Cells were washed three times with PBS and blocked with 4% BSA  
570 in PBS for 45 min. Cells were stained with the indicated primary antibodies and respective  
571 secondary antibodies coupled to Alexa488, or Alexa647, and Hoechst (Thermo Fisher Scientific,  
572 #33342) diluted in 4% BSA in PBS for 45 min at room temperature in the dark. Imaging was done  
573 on a Nikon ECLIPSE Ti-E-inverted microscope equipped with a spinning disk device (Perkin Elmer  
574 Ultraview), and images were processed using Volocity software (version 6.2.1, Perkin Elmer).

575

#### 576 **Quantitative RT-PCR**

577 HFF-1 WT or ZAP KO cells were infected with HCMV WT as described above. Cells were lysed in  
578 RLT buffer and RNA was purified using the Jena Analytik RNA isolation kit (845-KS-2040250),  
579 following the manufacturer's protocol. After RNA extraction, 1,500 ng of RNA per sample was used  
580 for further processing. DNase treatment and cDNA synthesis was performed with the iScript gDNA  
581 clear kit (172-5035) following the manufacturer's protocol. Generated cDNA was diluted 1:5 before  
582 performing qPCR to obtain 100  $\mu$ l of cDNA. For quantification of gene transcripts, 5  $\mu$ l of cDNA per  
583 sample were used and qRT-PCR was performed using the GoTaq<sup>®</sup> qPCR Master Mix (Promega,  
584 A6001) on a LightCycler 96 (Roche). GAPDH was used for normalisation. The following oligo  
585 sequences were used: GAPDH\_FOR: 5'-GAAGGTGAAGGTCGGAGTC; GAPDH\_REV:  
586 5'-GAAGATGGTGTGGGATTTTC; UL44\_FOR: 5'-CGCGACGTTACTTTGATTTGAG; UL44\_REV:  
587 5'-ATTCGGACGCCGACATTAG; UL83\_FOR: 5'-AACCAAGATGCAGGTGATAGG; UL83\_REV:  
588 5'-AGCGTGACGTGCATAAAGA; TNFRSF10D\_FOR: 5'-CTGCTGGTCCAGTGAATGACG;

589 TNFRSF10D\_REV: 5'-TTTTTCGGAGCCCACCAAGTTGGT; ZMAT3\_FOR:  
590 5'-GCTCTGTGATGCCTCCTTCAGT; ZMAT3\_REV: 5'-TTGACCCAGCTCTGAGGATTCC.

591

### 592 **Determination of HCMV genome copy numbers**

593 HFF-1 WT, control, or ZAP KO cells were infected with HCMV WT as described above. At indicated  
594 time points, cells were scraped into the supernatants and cells and supernatant were harvested  
595 together. DNA from 200 µl of the samples was extracted using the Qiagen DNeasy<sup>®</sup> Blood & Tissue  
596 kit (#69504) following the manufacturer's protocol. Extracted DNA was diluted 1:10 prior to qPCR  
597 for the analysis of HCMV genome copy numbers. HCMV DNA copy numbers were quantified with a  
598 real time quantitative PCR as described previously (Henke-Gendo *et al*, 2012). Copy numbers were  
599 harmonized to the 1<sup>st</sup> WHO International Standard for Human Cytomegalovirus for Nucleic Acid  
600 Amplification Techniques (NIBSC # 09/162).

601

### 602 **Total transcriptome analyses (RNA sequencing)**

603 HFF-1 WT, control and two independent ZAP KO cells (250,000 cells/well in a 6 well-plate format)  
604 were infected by centrifugal enhancement at 684 x g and 30°C for 45 minutes with HCMV WT at an  
605 MOI of 0.1. The moment when the virus was added to the cells was defined as time point 0. After  
606 centrifugation, cells were incubated at 37°C for 30 minutes followed by removal of the  
607 virus-containing medium and washed with fresh DMEM once. Medium was then replaced with  
608 previously conditioned medium (medium cells were originally seeded in, kept at 37°C during the  
609 infection time). Cells were lysed at the indicated time points using Trizol for 2 minutes at room  
610 temperature and kept at -70°C. Two wells were combined to obtain around 500,000 cells per  
611 sample. Total RNA was isolated using the RNA clean and concentrator kit (Zymo Research),  
612 according to the manufacturer's instructions. Sequencing libraries were prepared using the  
613 NEBNext Ultra II Directional RNA Library Prep Kit for Illumina (NEB, cat #E7760) following polyA

614 RNA enrichment (NEB cat #E7490) with 9 cycles PCR amplification, and sequenced on a HiSeq  
615 4000 1x50 cycles flowcell.

616 Alignments were done using hisat2 (Kim *et al*, 2015). Sequencing reads were aligned to the hg19  
617 version of the human genome using standard parameter, using the Refseq gtf file downloaded from  
618 the UCSC genome browser. Reads were then quantified using quasR (Gaidatzis *et al*, 2015) and  
619 the above mentioned gtf file, or the HCMV TB40/E annotation (accession number MF871618).  
620 Differential expression and corresponding p-values were calculated using edgeR (McCarthy *et al*,  
621 2012). Plots were created using ggplot2 (Wickham, 2009) and pheatmap v.1.0.12 (Kolde, R. 2019.  
622 pheatmap: Pretty Heatmaps. <https://cran.r-project.org/web/packages/pheatmap/index.html>).

623

#### 624 **SLAM sequencing**

625 HFF-1 WT or ZAP KO (g3) cells (250,000 cells/well in a 6-well format) were untreated or infected  
626 with HCMV WT at an MOI of 0.1 and the infection was enhanced by centrifugation at 684 x g at  
627 30°C for 45 min. The moment when the virus was added to the cells was defined as time point 0.  
628 After centrifugation, cells were incubated at 37°C for 30 minutes followed by removal of the  
629 virus-containing medium, one wash with DMEM and replacement with fresh medium. Newly  
630 synthesised RNA was labelled with 4-thiouridine (4sU) for one hour prior to cell lysis. Cells were  
631 lysed at the indicated time points using Trizol for 5 minutes at room temperature and kept at -70°C.  
632 Two wells were combined to obtain around 500,000 cells per sample. Total RNA was isolated using  
633 the DirectZOL kit (Zymo Research) according to the manufacturer's instruction including the  
634 optional on-column DNase digestion. The 4sU alkylation reaction was essentially performed as  
635 published before (Herzog *et al.*, 2017). Briefly, 7.5 – 15 µg total RNA were incubated in 1x PBS (pH  
636 8) containing 50% DMSO and 10 mM IAA at 50°C for 15 minutes. The reaction was quenched with  
637 100 mM DTT and RNA purified using the RNeasy kit (Qiagen). Quality and integrity of total RNA  
638 was controlled on 5200 Fragment Analyzer System. The RNA sequencing library was generated  
639 from 100 ng total RNA using NEBNext® Single Cell/Low Input RNA Library to manufacture's

640 protocols. The libraries were sequenced on Illumina NovaSeq 6000 using NovaSeq 6000 S1  
641 Reagent Kit (300 cycles, paired end run 2x 150 bp) with an average of  $40 \times 10^6$  reads per RNA  
642 sample.

643 SLAM-seq was performed in duplicates to identify newly synthesised and total RNA using  
644 GRAND-SLAM. Sequencing adapters (AGATCGGAAGAGCACACGTCTGAACTCCAGTCA,  
645 AGATCGGAAGAGCGTCGTGTAGGGAAAGAGTGT) were trimmed using Trimmomatic (v0.39)  
646 (Bolger *et al*, 2014). Reads were mapped to a combined index of the human genome (Hg38 /  
647 Ensembl v90) and the HCMV genome (accession number KF297339.1) using STAR (v2.5.3a) with  
648 parameters `--outFilterMismatchNmax 20 --outFilterScoreMinOverLread 0.3`  
649 `--outFilterMatchNminOverLread 0.3 --alignEndsType Extend5pOfReads12 --outSAMattributes nM`  
650 `MD NH`. We used GRAND-SLAM (v2.0.5d) (Jurges *et al.*, 2018) to estimate the new-to-total RNA  
651 ratios. We only used the parts of the reads that were sequenced by both mates in a read pair  
652 (parameter `-double`) for the estimation. New RNA was computed by multiplying total RNA with the  
653 maximum *a posteriori* estimate of the new-to-total RNA ratio. For further analyses, we removed all  
654 cellular genes that had less than 10 transcripts per million transcripts (TPM) in more than 6 (cellular  
655 genes) or 2 (viral genes) samples. To remove artefacts due to imprecise quantification, we  
656 furthermore removed all viral genes with less than 100 new reads. Log2 fold changes were  
657 estimated using PsiLFC (Erhard, 2018) with uninformative prior (corresponding to no  
658 pseudocounts). Normalization factors were computed from total RNA such that the median log2 fold  
659 change was 0 and applied to both total and new RNA.

660

### 661 **Total proteome analyses using LC-MS/MS**

662 HFF-1 WT or ZAP KO (250,000 cells/well in a 6-well format) were infected with HCMV WT at an  
663 MOI of 0.1 and the infection was enhanced by centrifugation at 684 x g at 30°C for 45 min. The  
664 moment when the virus was added to the cells was defined as time point 0. After centrifugation,  
665 cells were incubated at 37°C for 30 minutes followed by removal of the virus-containing medium,

666 one wash with DMEM and replacement with fresh medium. At indicated time points, cells were  
667 washed with PBS once and then collected in 300  $\mu$ l of fresh PBS per well. Cell pellets were frozen  
668 at  $-70^{\circ}\text{C}$ . Two wells were combined to obtain a total of 500,000 cells in total per condition.  
669 Quadruplicates of HCMV infected HFF-1 cells were analysed at 48 and 72 hours post infection. For  
670 each replicate, cells were washed with PBS, lysed in SDS lysis buffer (4% SDS, 10 mM DTT,  
671 50 mM Tris/HCl pH 7.6), boiled at  $95^{\circ}\text{C}$  for 5 min and sonicated ( $4^{\circ}\text{C}$ , 10 min, 30 sec on, 30 sec off;  
672 Bioruptor). Protein concentrations of cleared lysates were normalised and cysteines were alkylated  
673 with 5.5 mM IAA (20 min,  $25^{\circ}\text{C}$ , in the dark). SDS was removed by protein precipitation with 80%  
674 (v/v) acetone ( $-20^{\circ}\text{C}$ , overnight), protein pellets were washed with 80% (v/v) acetone and  
675 resuspended in 40  $\mu$ l U/T buffer (6 M urea, 2 M thiourea in 10 mM HEPES, pH 8.0). Protein  
676 digestion was performed by subsequent addition of 1  $\mu$ g LysC (3h,  $25^{\circ}\text{C}$ ) and 1  $\mu$ g Trypsin in 160  $\mu$ l  
677 digestion buffer (50 mM ammonium bicarbonate, pH 8.0) at  $25^{\circ}\text{C}$  overnight. Peptides were desalted  
678 and concentrated using C18 Stage-Tips as described previously (Hubel *et al*, 2019). Purified  
679 peptides were loaded onto a 50 cm reverse-phase analytical column (75  $\mu$ m diameter; ReproSil-Pur  
680 C18-AQ 1.9  $\mu$ m resin; Dr. Maisch) and separated using an EASY-nLC 1200 system (Thermo Fisher  
681 Scientific). A binary buffer system consisting of buffer A (0.1% formic acid in H<sub>2</sub>O) and buffer B  
682 (80% acetonitrile, 0.1% formic acid in H<sub>2</sub>O) with a 120 min gradient [5-30% buffer B (95 min),  
683 30-95% buffer B (10 min), wash out at 95% buffer B (5 min), decreased to 5% buffer B (5 min), and  
684 5% buffer B (5 min)] was used at a flow rate of 300 nl per min. Eluting peptides were directly  
685 analysed on a Q-Exactive HF mass spectrometer (Thermo Fisher Scientific). Data-dependent  
686 acquisition included repeating cycles of one MS1 full scan (300–1,650 m/z, R = 60,000 at 200 m/z)  
687 at an ion target of  $3 \times 10^6$ , followed by 15 MS2 scans of the highest abundant isolated and  
688 higher-energy collisional dissociation (HCD) fragmented peptide precursors (R = 15,000 at  
689 200 m/z). For MS2 scans, collection of isolated peptide precursors was limited by an ion target of  
690  $1 \times 10^5$  and a maximum injection time of 25 ms. Isolation and fragmentation of the same peptide  
691 precursor was eliminated by dynamic exclusion for 20 s. The isolation window of the quadrupole

692 was set to 1.4 m/z and HCD was set to a normalised collision energy of 27%. Raw files were  
693 processed with MaxQuant (version 1.6.14.0) using the standard settings and label-free  
694 quantification (LFQ) and match between runs options enabled. Spectra were searched against  
695 forward and reverse sequences of the reviewed human proteome including isoforms (UniprotKB,  
696 release 01.2019) and of the HCMV proteins by the built-in Andromeda search engine (Tyanova *et*  
697 *al*, 2016a).

698

### 699 **Statistical analyses**

700 The output of MaxQuant was analysed with Perseus (version 1.6.14.0, Tyanova *et al*, 2016b), R  
701 (version 3.6.0), RStudio (version 1.2.1335) and GraphPad Prism (version 7.04). Detected protein  
702 groups identified as known contaminants, reverse sequence matches, only identified by site or  
703 quantified in less than 3 out of 4 replicates in at least one condition were excluded. Following log<sub>2</sub>  
704 transformation, missing values were imputed for each replicate individually by sampling values from  
705 a normal distribution calculated from the original data distribution (width = 0.3\*s.d., downshift =  
706 -1.8\*s.d.). Differentially expressed protein groups between biological conditions were identified via  
707 two-sided Student's T-tests corrected for multiple hypotheses testing applying a permutation-based  
708 FDR (250 randomizations).

709 For qRT-PCR and genome copy number quantification, differences between data sets were  
710 evaluated after log transformation by Student's *t*-test (unpaired, two-tailed), using GraphPad Prism  
711 version 5.0 (GraphPad Software, San Diego, CA). *P* values < 0.05 were considered statistically  
712 significant.



713 **Acknowledgements**

714  
715 We would like to thank Niels Lemmermann and Baca Chan for their insightful comments as well as  
716 John Schoggins for generously providing us with ISG expression plasmids. We also thank Georg  
717 Wolf and Christine Standfuß-Gabisch for excellent technical assistance.

718 The PhD scholarship to ACGP was funded by the European Union's Horizon 2020 research and  
719 innovation programme (H2020) under the Marie Skłodowska-Curie Innovative Training Networks  
720 Programme MSCA-ITN GA 675278 EDGE (Training Network providing cutting-EDGE knowLEDGE  
721 on Herpes Virology and Immunology). MS was funded by the Deutsche Forschungsgemeinschaft  
722 (DFG, German Research Foundation) – Project number 158989968 - SFB 900, and MMB by the  
723 SMART BIOTECS alliance between the Technische Universität Braunschweig and the Leibniz  
724 Universität Hannover, an initiative supported by the Ministry of Science and Culture (MWK) of Lower  
725 Saxony, Germany, and the Helmholtz Association (W2/W3-090).

726

727 **Author contributions**

728  
729 Conceptualization, ACGP, MS, MMB; Methodology, ACGP, MS, EW, A Piras, TH; Investigation,  
730 ACGP, MS, EW, CU, FH, MMB; Writing-Original Draft, ACGP, MS, MMB; Writing-Review & Editing,  
731 ACGP, MS, EW, CU, A Piras, TH, AH, ML, A Pichlmair, FE, LD, MMB; Funding Acquisition, MMB;  
732 Resources, AH, ML, A Pichlmair, LD, MMB; Supervision, MS, MMB.

733

734 **Conflict of interest**

735

736 The authors declare that they have no conflict of interest.



737 **References**

- 738
- 739 Andreoni M, Faircloth M, Vugler L, Britt WJ (1989) A rapid microneutralization assay for the measurement  
740 of neutralizing antibody reactive with human cytomegalovirus. *J Virol Methods* 23: 157-167
- 741 Antequera F, Bird A (1993) Number of CpG islands and genes in human and mouse. *Proc Natl Acad Sci U S A*  
742 90: 11995-11999
- 743 Aravind L (2001) The WWE domain: a common interaction module in protein ubiquitination and ADP  
744 ribosylation. *Trends Biochem Sci* 26: 273-275
- 745 Atalay R, Zimmermann A, Wagner M, Borst E, Benz C, Messerle M, Hengel H (2002) Identification and  
746 expression of human cytomegalovirus transcription units coding for two distinct Fcγ receptor  
747 homologs. *J Virol* 76: 8596-8608
- 748 Benedict CA, Butrovich KD, Lurain NS, Corbeil J, Rooney I, Schneider P, Tschopp J, Ware CF (1999) Cutting  
749 edge: a novel viral TNF receptor superfamily member in virulent strains of human cytomegalovirus.  
750 *J Immunol* 162: 6967-6970
- 751 Bersani C, Xu LD, Vilborg A, Lui WO, Wiman KG (2014) Wig-1 regulates cell cycle arrest and cell death  
752 through the p53 targets FAS and 14-3-3sigma. *Oncogene* 33: 4407-4417
- 753 Bestor TH, Coxon A (1993) Cytosine methylation: the pros and cons of DNA methylation. *Curr Biol* 3:  
754 384-386
- 755 Bick MJ, Carroll JW, Gao G, Goff SP, Rice CM, MacDonald MR (2003) Expression of the zinc-finger antiviral  
756 protein inhibits alphavirus replication. *J Virol* 77: 11555-11562
- 757 Bitra A, Nemčovičová I, Picarda G, Doukov T, Wang J, Benedict CA, Zajonc DM (2019) Structure of human  
758 cytomegalovirus UL144, an HVEM orthologue, bound to the B and T cell lymphocyte attenuator. *J*  
759 *Biol Chem* 294: 10519-10529
- 760 Bolger AM, Lohse M, Usadel B (2014) Trimmomatic: a flexible trimmer for Illumina sequence data.  
761 *Bioinformatics* 30: 2114-2120
- 762 Charron G, Li MM, MacDonald MR, Hang HC (2013) Prenylome profiling reveals S-farnesylation is crucial for  
763 membrane targeting and antiviral activity of ZAP long-isoform. *Proc Natl Acad Sci U S A* 110:  
764 11085-11090
- 765 Chee MS, Bankier AT, Beck S, Bohni R, Brown CM, Cerny R, Horsnell T, Hutchison CA, 3rd, Kouzarides T,  
766 Martignetti JA *et al* (1990) Analysis of the protein-coding content of the sequence of human  
767 cytomegalovirus strain AD169. *Curr Top Microbiol Immunol* 154: 125-169
- 768 Cheung TC, Humphreys IR, Potter KG, Norris PS, Shumway HM, Tran BR, Patterson G, Jean-Jacques R, Yoon  
769 M, Spear PG *et al* (2005) Evolutionarily divergent herpesviruses modulate T cell activation by  
770 targeting the herpesvirus entry mediator cosignaling pathway. *Proc Natl Acad Sci U S A* 102:  
771 13218-13223
- 772 Chiu HP, Chiu H, Yang CF, Lee YL, Chiu FL, Kuo HC, Lin RJ, Lin YL (2018) Inhibition of Japanese encephalitis  
773 virus infection by the host zinc-finger antiviral protein. *PLoS Pathog* 14: e1007166
- 774 Cohen JI, Corey GR (1985) Cytomegalovirus infection in the normal host. *Medicine (Baltimore)* 64: 100-114
- 775 Corrales-Aguilar E, Hoffmann K, Hengel H (2014) CMV-encoded Fcγ receptors: modulators at the interface  
776 of innate and adaptive immunity. *Semin Immunopathol* 36: 627-640
- 777 Cortese M, Calò S, D'Aurizio R, Lilja A, Pacchiani N, Merola M (2012) Recombinant human cytomegalovirus  
778 (HCMV) RL13 binds human immunoglobulin G Fc. *PLoS One* 7: e50166
- 779 Davison AJ, Akter P, Cunningham C, Dolan A, Addison C, Dargan DJ, Hassan-Walker AF, Emery VC, Griffiths  
780 PD, Wilkinson GWG (2003a) Homology between the human cytomegalovirus RL11 gene family and  
781 human adenovirus E3 genes. *J Gen Virol* 84: 657-663

- 782 Davison AJ, Dolan A, Akter P, Addison C, Dargan DJ, Alcendor DJ, McGeoch DJ, Hayward GS (2003b) The  
783 human cytomegalovirus genome revisited: comparison with the chimpanzee cytomegalovirus  
784 genome. *J Gen Virol* 84: 17-28
- 785 Erhard F (2018) Estimating pseudocounts and fold changes for digital expression measurements.  
786 *Bioinformatics* 34: 4054-4063
- 787 Gaidatzis D, Lerch A, Hahne F, Stadler MB (2015) QuasR: quantification and annotation of short reads in R.  
788 *Bioinformatics* 31: 1130-1132
- 789 Galitska G, Biolatti M, De Andrea M, Leone A, Coscia A, Bertolotti L, Ala U, Bertino E, Dell'Oste V, Landolfo S  
790 (2018) Biological relevance of Cytomegalovirus genetic variability in congenitally and postnatally  
791 infected children. *J Clin Virol* 108: 132-140
- 792 Gonzalez-Perez AC, Stempel M, Chan B, Brinkmann MM (2020) One Step Ahead: Herpesviruses Light the  
793 Way to Understanding Interferon-Stimulated Genes (ISGs). *Front Microbiol* 11: 124
- 794 Goodrum F, Reeves M, Sinclair J, High K, Shenk T (2007) Human cytomegalovirus sequences expressed in  
795 latently infected individuals promote a latent infection in vitro. *Blood* 110: 937-945
- 796 Guo X, Carroll JW, Macdonald MR, Goff SP, Gao G (2004) The zinc finger antiviral protein directly binds to  
797 specific viral mRNAs through the CCCH zinc finger motifs. *J Virol* 78: 12781-12787
- 798 Guo X, Ma J, Sun J, Gao G (2007) The zinc-finger antiviral protein recruits the RNA processing exosome to  
799 degrade the target mRNA. *Proc Natl Acad Sci U S A* 104: 151-156
- 800 Haeussler M, Schönig K, Eckert H, Eschstruth A, Mianné J, Renaud JB, Schneider-Maunoury S, Shkumatava  
801 A, Teboul L, Kent J *et al* (2016) Evaluation of off-target and on-target scoring algorithms and  
802 integration into the guide RNA selection tool CRISPOR. *Genome Biol* 17: 148
- 803 Heckl D, Kowalczyk MS, Yudovich D, Belizaire R, Puram RV, McConkey ME, Thielke A, Aster JC, Regev A,  
804 Ebert BL (2014) Generation of mouse models of myeloid malignancy with combinatorial genetic  
805 lesions using CRISPR-Cas9 genome editing. *Nat Biotechnol* 32: 941-946
- 806 Henke-Gendo C, Ganzenmueller T, Kluba J, Harste G, Raggub L, Heim A (2012) Improved quantitative PCR  
807 protocols for adenovirus and CMV with an internal inhibition control system and automated nucleic  
808 acid isolation. *J Med Virol* 84: 890-896
- 809 Herzog VA, Reichholf B, Neumann T, Rescheneder P, Bhat P, Burkard TR, Wlotzka W, von Haeseler A, Zuber  
810 J, Ameres SL (2017) Thiol-linked alkylation of RNA to assess expression dynamics. *Nat Methods* 14:  
811 1198-1204
- 812 Huang Z, Wang X, Gao G (2010) Analyses of SELEX-derived ZAP-binding RNA aptamers suggest that the  
813 binding specificity is determined by both structure and sequence of the RNA. *Protein Cell* 1:  
814 752-759
- 815 Hubel P, Urban C, Bergant V, Schneider WM, Knauer B, Stukalov A, Scaturro P, Mann A, Brunotte L,  
816 Hoffmann HH *et al* (2019) A protein-interaction network of interferon-stimulated genes extends  
817 the innate immune system landscape. *Nat Immunol* 20: 493-502
- 818 Jurgens C, Dolken L, Erhard F (2018) Dissecting newly transcribed and old RNA using GRAND-SLAM.  
819 *Bioinformatics* 34: i218-i226
- 820 Katoh M, Katoh M (2003) Identification and characterization of human TIPARP gene within the CCNL  
821 amplicon at human chromosome 3q25.31. *Int J Oncol* 23: 541-547
- 822 Kerns JA, Emerman M, Malik HS (2008) Positive selection and increased antiviral activity associated with the  
823 PARP-containing isoform of human zinc-finger antiviral protein. *PLoS Genet* 4: e21
- 824 Kim D, Langmead B, Salzberg SL (2015) HISAT: a fast spliced aligner with low memory requirements. *Nat*  
825 *Methods* 12: 357-360
- 826 Li MMH, Aguilar EG, Michailidis E, Pabon J, Park P, Wu X, de Jong YP, Schneider WM, Molina H, Rice CM *et*  
827 *al* (2019) Characterization of Novel Splice Variants of Zinc Finger Antiviral Protein (ZAP). *J Virol* 93
- 828 Lilley BN, Ploegh HL, Tirabassi RS (2001) Human cytomegalovirus open reading frame TRL11/IRL11 encodes  
829 an immunoglobulin G Fc-binding protein. *J Virol* 75: 11218-11221

- 830 Lin YT, Chiweshe S, McCormick D, Raper A, Wickenhagen A, DeFillipis V, Gaunt E, Simmonds P, Wilson SJ,  
831 Grey F (2020) Human cytomegalovirus evades ZAP detection by suppressing CpG dinucleotides in  
832 the major immediate early 1 gene. *PLoS Pathog* 16: e1008844
- 833 Liu CH, Zhou L, Chen G, Krug RM (2015) Battle between influenza A virus and a newly identified antiviral  
834 activity of the PARP-containing ZAPL protein. *Proc Natl Acad Sci U S A* 112: 14048-14053
- 835 Luo X, Wang X, Gao Y, Zhu J, Liu S, Gao G, Gao P (2020) Molecular Mechanism of RNA Recognition by  
836 Zinc-Finger Antiviral Protein. *Cell Rep* 30: 46-52.e44
- 837 Lurain NS, Kapell KS, Huang DD, Short JA, Paintsil J, Winkfield E, Benedict CA, Ware CF, Bremer JW (1999)  
838 Human cytomegalovirus UL144 open reading frame: sequence hypervariability in low-passage  
839 clinical isolates. *J Virol* 73: 10040-10050
- 840 McCarthy DJ, Chen Y, Smyth GK (2012) Differential expression analysis of multifactor RNA-Seq experiments  
841 with respect to biological variation. *Nucleic Acids Res* 40: 4288-4297
- 842 Meagher JL, Takata M, Goncalves-Carneiro D, Keane SC, Rebendenne A, Ong H, Orr VK, MacDonald MR,  
843 Stuckey JA, Bieniasz PD *et al* (2019) Structure of the zinc-finger antiviral protein in complex with  
844 RNA reveals a mechanism for selective targeting of CG-rich viral sequences. *Proc Natl Acad Sci U S A*  
845 116: 24303-24309
- 846 Meyers JD, Flournoy N, Thomas ED (1986) Risk factors for cytomegalovirus infection after human marrow  
847 transplantation. *J Infect Dis* 153: 478-488
- 848 Montgomery RI, Warner MS, Lum BJ, Spear PG (1996) Herpes simplex virus-1 entry into cells mediated by a  
849 novel member of the TNF/NGF receptor family. *Cell* 87: 427-436
- 850 Muller S, Moller P, Bick MJ, Wurr S, Becker S, Gunther S, Kummerer BM (2007) Inhibition of filovirus  
851 replication by the zinc finger antiviral protein. *J Virol* 81: 2391-2400
- 852 Murrell I, Wilkie GS, Davison AJ, Statkute E, Fielding CA, Tomasec P, Wilkinson GW, Stanton RJ (2016)  
853 Genetic Stability of Bacterial Artificial Chromosome-Derived Human Cytomegalovirus during  
854 Culture In Vitro. *J Virol* 90: 3929-3943
- 855 Nobre LV, Nightingale K, Ravenhill BJ, Antrobus R, Soday L, Nichols J, Davies JA, Seirafian S, Wang EC,  
856 Davison AJ *et al* (2019) Human cytomegalovirus interactome analysis identifies degradation hubs,  
857 domain associations and viral protein functions. *Elife* 8
- 858 Odon V, Fros JJ, Goonawardane N, Dietrich I, Ibrahim A, Alshaikhahmed K, Nguyen D, Simmonds P (2019)  
859 The role of ZAP and OAS3/RNaseL pathways in the attenuation of an RNA virus with elevated  
860 frequencies of CpG and UpA dinucleotides. *Nucleic Acids Res* 47: 8061-8083
- 861 Peng C, Wyatt LS, Glushakow-Smith SG, Lal-Nag M, Weisberg AS, Moss B (2020) Zinc-finger antiviral protein  
862 (ZAP) is a restriction factor for replication of modified vaccinia virus Ankara (MVA) in human cells.  
863 *PLoS Pathog* 16: e1008845
- 864 Poole E, Atkins E, Nakayama T, Yoshie O, Groves I, Alcami A, Sinclair J (2008) NF-kappaB-mediated  
865 activation of the chemokine CCL22 by the product of the human cytomegalovirus gene UL144  
866 escapes regulation by viral IE86. *J Virol* 82: 4250-4256
- 867 Poole E, Groves I, MacDonald A, Pang Y, Alcami A, Sinclair J (2009) Identification of TRIM23 as a cofactor  
868 involved in the regulation of NF-kappaB by human cytomegalovirus. *J Virol* 83: 3581-3590
- 869 Poole E, King CA, Sinclair JH, Alcami A (2006) The UL144 gene product of human cytomegalovirus activates  
870 NFkappaB via a TRAF6-dependent mechanism. *Embo j* 25: 4390-4399
- 871 Poole E, Walther A, Raven K, Benedict CA, Mason GM, Sinclair J (2013) The myeloid transcription factor  
872 GATA-2 regulates the viral UL144 gene during human cytomegalovirus latency in an isolate-specific  
873 manner. *J Virol* 87: 4261-4271
- 874 Ramsay ME, Miller E, Peckham CS (1991) Outcome of confirmed symptomatic congenital cytomegalovirus  
875 infection. *Arch Dis Child* 66: 1068-1069

- 876 Ripalti A, Mocarski ES (1991) The products of human cytomegalovirus genes UL1-UL7, including gp48, are  
877 dispensable for growth in cell culture. In: *Progress in Cytomegalovirus Research: Proceedings of the*  
878 *Third International Cytomegalovirus Workshop*, pp. 57-60. Elsevier Science Publishers:
- 879 Rossetto CC, Tarrant-Elorza M, Pari GS (2013) Cis and trans acting factors involved in human  
880 cytomegalovirus experimental and natural latent infection of CD14 (+) monocytes and CD34 (+)  
881 cells. *PLoS Pathog* 9: e1003366
- 882 Schneider WM, Chevillotte MD, Rice CM (2014) Interferon-stimulated genes: a complex web of host  
883 defenses. *Annu Rev Immunol* 32: 513-545
- 884 Schoggins JW, MacDuff DA, Imanaka N, Gaaney MD, Shrestha B, Eitson JL, Mar KB, Richardson RB, Ratushny  
885 AV, Litvak V *et al* (2014) Pan-viral specificity of IFN-induced genes reveals new roles for cGAS in  
886 innate immunity. *Nature* 505: 691-695
- 887 Schoggins JW, Wilson SJ, Panis M, Murphy MY, Jones CT, Bieniasz P, Rice CM (2011) A diverse range of gene  
888 products are effectors of the type I interferon antiviral response. *Nature* 472: 481-485
- 889 Schwerk J, Soveg FW, Ryan AP, Thomas KR, Hatfield LD, Ozarkar S, Forero A, Kell AM, Roby JA, So L *et al*  
890 (2019) RNA-binding protein isoforms ZAP-S and ZAP-L have distinct antiviral and immune resolution  
891 functions. *Nat Immunol* 20: 1610-1620
- 892 Šedý JR, Bjordahl RL, Bekiaris V, Macauley MG, Ware BC, Norris PS, Lurain NS, Benedict CA, Ware CF (2013)  
893 CD160 activation by herpesvirus entry mediator augments inflammatory cytokine production and  
894 cytolytic function by NK cells. *J Immunol* 191: 828-836
- 895 Sharma V, Mobeen F, Prakash T (2016) Comparative Genomics of Herpesviridae Family to Look for Potential  
896 Signatures of Human Infecting Strains. *Int J Genomics* 2016: 9543274
- 897 Shnayder M, Nachshon A, Krishna B, Poole E, Boshkov A, Binyamin A, Maza I, Sinclair J, Schwartz M,  
898 Stern-Ginossar N (2018) Defining the Transcriptional Landscape during Cytomegalovirus Latency  
899 with Single-Cell RNA Sequencing. *mBio* 9
- 900 Sinzger C, Hahn G, Digel M, Katona R, Sampaio KL, Messerle M, Hengel H, Koszinowski U, Brune W, Adler B  
901 (2008) Cloning and sequencing of a highly productive, endotheliotropic virus strain derived from  
902 human cytomegalovirus TB40/E. *J Gen Virol* 89: 359-368
- 903 Stanton RJ, Baluchova K, Dargan DJ, Cunningham C, Sheehy O, Seirafian S, McSharry BP, Neale ML, Davies  
904 JA, Tomasec P *et al* (2010) Reconstruction of the complete human cytomegalovirus genome in a  
905 BAC reveals RL13 to be a potent inhibitor of replication. *J Clin Invest* 120: 3191-3208
- 906 Stempel M, Chan B, Brinkmann MM (2019) Coevolution pays off: Herpesviruses have the license to escape  
907 the DNA sensing pathway. *Med Microbiol Immunol*
- 908 Stinski MF (1978) Sequence of protein synthesis in cells infected by human cytomegalovirus: early and late  
909 virus-induced polypeptides. *J Virol* 26: 686-701
- 910 Su C, Zhang J, Zheng C (2015) Herpes simplex virus 1 UL41 protein abrogates the antiviral activity of hZAP  
911 by degrading its mRNA. *Virology* 531: 203
- 912 Takata MA, Gonçalves-Carneiro D, Zang TM, Soll SJ, York A, Blanco-Melo D, Bieniasz PD (2017) CG  
913 dinucleotide suppression enables antiviral defence targeting non-self RNA. *Nature* 550: 124
- 914 Takekoshi M, Maeda-Takekoshi F, Ihara S, Sakuma S, Watanabe Y (1991) Site-specific stable insertion into  
915 the human cytomegalovirus genome of a foreign gene under control of the SV40 promoter. *Gene*  
916 101: 209-213
- 917 Tang Q, Wang X, Gao G (2017) The Short Form of the Zinc Finger Antiviral Protein Inhibits Influenza A Virus  
918 Protein Expression and Is Antagonized by the Virus-Encoded NS1. *J Virol* 91
- 919 Teng MW, Bolovan-Fritts C, Dar RD, Womack A, Simpson ML, Shenk T, Weinberger LS (2012) An  
920 endogenous accelerator for viral gene expression confers a fitness advantage. *Cell* 151: 1569-1580
- 921 Todorova T, Bock FJ, Chang P (2014) PARP13 regulates cellular mRNA post-transcriptionally and functions as  
922 a pro-apoptotic factor by destabilizing TRAILR4 transcript. *Nat Commun* 5: 5362

923 Tyanova S, Temu T, Cox J (2016a) The MaxQuant computational platform for mass spectrometry-based  
924 shotgun proteomics. *Nat Protoc* 11: 2301-2319

925 Tyanova S, Temu T, Sinitcyn P, Carlson A, Hein MY, Geiger T, Mann M, Cox J (2016b) The Perseus  
926 computational platform for comprehensive analysis of (prote)omics data. *Nat Methods* 13: 731-740

927 Umashankar M, Petrucelli A, Cicchini L, Caposio P, Kreklywich CN, Rak M, Bughio F, Goldman DC, Hamlin KL,  
928 Nelson JA *et al* (2011) A novel human cytomegalovirus locus modulates cell type-specific outcomes  
929 of infection. *PLoS Pathog* 7: e1002444

930 Waters A, Hassan J, De Gascun C, Kissoon G, Knowles S, Molloy E, Connell J, Hall WW (2010) Human  
931 cytomegalovirus UL144 is associated with viremia and infant development sequelae in congenital  
932 infection. *J Clin Microbiol* 48: 3956-3962

933 Wathen MW, Stinski MF (1982) Temporal patterns of human cytomegalovirus transcription: mapping the  
934 viral RNAs synthesized at immediate early, early, and late times after infection. *J Virol* 41: 462-477

935 Weekes MP, Tomasec P, Huttlin EL, Fielding CA, Nusinow D, Stanton RJ, Wang EC, Aicheler R, Murrell I,  
936 Wilkinson GW *et al* (2014) Quantitative temporal viromics: an approach to investigate  
937 host-pathogen interaction. *Cell* 157: 1460-1472

938 Wickham H (2009) *ggplot2: Elegant Graphics for Data Analysis*

939 Xie L, Lu B, Zheng Z, Miao Y, Liu Y, Zhang Y, Zheng C, Ke X, Hu Q, Wang H (2018) The 3C protease of  
940 enterovirus A71 counteracts the activity of host zinc-finger antiviral protein (ZAP). *J Gen Virol* 99:  
941 73-85

942 Zamora MR (2004) Cytomegalovirus and lung transplantation. *Am J Transplant* 4: 1219-1226

943 Zhu Y, Chen G, Lv F, Wang X, Ji X, Xu Y, Sun J, Wu L, Zheng YT, Gao G (2011) Zinc-finger antiviral protein  
944 inhibits HIV-1 infection by selectively targeting multiply spliced viral mRNAs for degradation. *Proc*  
945 *Natl Acad Sci U S A* 108: 15834-15839

946



947 **Figure legends**

948

949 **Figure 1. Expression kinetics of ZAP-S and ZAP-L in HCMV infected fibroblasts.**

950 **(A)** Schematic representation of the protein domains of the two main isoforms of ZAP, the long  
951 isoform ZAP-L and the short isoform ZAP-S. Both isoforms share four CCCH-type zinc finger motifs  
952 at the N-terminal domain, as well as a TPH domain containing a fifth zinc finger motif, and a WWE  
953 domain, while the C-terminal PARP-like domain is only present in ZAP-L. TPH = TiPARP homology  
954 domain, PARP = poly(ADP-ribose)-polymerase. **(B)** Primary human fibroblasts (HFF-1) were either  
955 mock treated, infected by centrifugal enhancement with HCMV (MOI 0.1), or stimulated by addition  
956 of recombinant IFN $\beta$  (20 ng/ml), and expression of ZAP and actin was analysed 24 hours later by  
957 immunoblotting with a ZAP- or actin-specific antibody. Hpi = hours post infection. **(C)** Three  
958 independent ZAP KO cell lines were generated by Cas9-mediated gene editing using three different  
959 gRNAs (g1, g2 and g3) which target the first exon of the *zc3hav1* gene. **(D-F)** Wild-type HFF-1 and  
960 the three ZAP KO **(D)** or control **(E-F)** cell lines were mock treated or infected by centrifugal  
961 enhancement with HCMV (MOI 0.1) for the indicated time points and cell lysates were subjected to  
962 immunoblotting with specific antibodies against ZAP and actin. Quantifications of ZAP-L (in green)  
963 or ZAP-S (in blue) band intensities normalised to actin are represented in line graphs.

964 **Figure 2. ZAP-S and ZAP-L restrict HCMV replication in HFF-1 cells.**

965 **(A)** Schematic representation of the workflow to determine HCMV genome copy numbers. WT,  
966 control, or ZAP KO HFF-1 cells were infected with HCMV (MOI 0.1) for 2 hours. Both cells and  
967 supernatant were harvested at 1, 3, and 5 days post infection (dpi), followed by DNA extraction and  
968 measurement of viral genome copies by qPCR. **(B)** HCMV genome copy numbers from WT,  
969 control, or ZAP KO HFF-1 cells were determined as described in **(A)**. HCMV copy numbers/ml are  
970 displayed as bar plots showing mean  $\pm$  S.D. of triplicates. Results shown are one representative of  
971 at least three independent experiments using two different ZAP KO cell lines with similar results  
972 obtained in all replicates. **(C)** Schematic representation of the workflow to reconstitute ZAP KO  
973 HFF-1 cells. HEK 293T cells were transfected with either myc-tagged ZAP-S or ZAP-L expression  
974 plasmids together with the packaging (gag-pol) and the envelope (VSV-G) plasmids to produce  
975 lentiviruses harbouring ZAP-S or ZAP-L, respectively, followed by transduction of ZAP KO HFF-1  
976 cells. As control, WT and ZAP KO HFF-1 cells were transduced with lentiviruses harbouring empty  
977 vector. **(D)** Subcellular localisation of myc-tagged ZAP-S and ZAP-L in ZAP KO HFF-1 cells. ZAP  
978 KO cells were transduced as described in **(C)** with either myc-tagged ZAP-S or ZAP-L. Transduced  
979 cells were infected by centrifugal enhancement with HCMV (MOI 0.1) and 24 hours post infection  
980 cells were fixed for immunolabelling with myc- and IE1-specific antibodies. **(E,F)** HCMV genome  
981 copy numbers from WT, ZAP KO, or ZAP KO HFF-1 cells reconstituted with ZAP-S **(E)** or ZAP-L **(F)**  
982 were determined as described in **(A)**. HCMV copy numbers/ml are displayed as bar plots showing  
983 mean  $\pm$  S.D. of one **(E)** or two independent **(F)** experiments performed with experimental triplicates.  
984 Two independent experiments for both ZAP-S and ZAP-L were performed.  
985 Significant changes were calculated using unpaired two-sided Student's t-tests, n.s. not significant,  
986 \* $p < 0.05$ , \*\* $p < 0.01$ , \*\*\* $p < 0.001$  and \*\*\*\* $p < 0.0001$ .

987 **Figure 3. ZAP have a negative impact on early and late HCMV protein levels.**

988 **(A)** WT or ZAP KO HFF-1 cells were infected by centrifugal enhancement with HCMV (MOI 0.1) and  
989 lysates were analysed at the indicated time points post infection by immunoblotting with specific  
990 antibodies against HCMV UL44, HCMV UL83, and actin. One representative experiment performed  
991 with three independent ZAP KO cell lines is shown, with similar results in all three experiments.  
992 Quantifications of UL44 and UL83 band intensities normalised to actin are represented as bar plots.  
993 **(B)** WT and ZAP KO HFF-1 cells were mock treated or infected by centrifugal enhancement with  
994 HCMV (MOI 0.1) and cell lysates were subjected to total proteome LC-MS/MS analysis at the  
995 indicated time points. Represented are volcano plots (x-axis: log<sub>2</sub> fold change, y-axis: -log<sub>10</sub>  
996 p-value) showing differentially expressed proteins at 48 and 72 hours post HCMV infection with  
997 significantly changed proteins (unpaired two-sided Student's t-test with permutation-based FDR:  
998 0.05, S<sub>0</sub>=0.1). **(C-E)** Time-resolved expression changes of HCMV UL44 and UL83 **(C)**, UL84 **(D)**,  
999 UL103, or UL104 **(E)** in HCMV-infected WT and ZAP KO HFF-1 cells displayed as bar plots  
1000 showing mean ± S.D. of quadruplicates. **(F, G)** WT, ZAP KO, or ZAP KO HFF-1 cells reconstituted  
1001 with either ZAP-S **(F)** or ZAP-L **(G)** were infected by centrifugal enhancement with HCMV (MOI 0.1)  
1002 and lysates were analysed at the indicated time points post infection by immunoblotting with specific  
1003 antibodies against ZAP, HCMV UL44 and actin. **(F,G)** Quantification of UL44 band intensities  
1004 normalised to actin is represented as bar plots. One representative of at least 2 independent  
1005 experiments is shown.  
1006 Significant changes were calculated using unpaired two-sided Student's t-tests, n.s. not significant,  
1007 \* $p < 0.05$ , \*\* $p < 0.01$ , and \*\*\* $p < 0.001$ .



1008 **Figure 4. ZAP-S and ZAP-L negatively affect early and late HCMV transcripts.**

1009 **(A)** WT or ZAP KO HFF-1 cells were infected by centrifugal enhancement with HCMV (MOI 0.1).  
1010 Total RNA was extracted at indicated time points post infection and mRNA levels of HCMV *UL44*  
1011 and *UL83* were measured by qRT-PCR. Viral mRNA relative expression ( $\log_{10}$ ) normalised to  
1012 *GAPDH* is displayed as bar plots showing mean  $\pm$  S.D. of three independent experiments  
1013 performed with experimental duplicates. Experiments were performed in three independent ZAP  
1014 KO cell lines and results were combined. **(B)** ZAP KO HFF-1 stably expressing either ZAP-S,  
1015 ZAP-L, or transduced with empty vector control, and WT cells expressing empty vector, were  
1016 infected by centrifugal enhancement with HCMV (MOI 0.1). Total RNA was extracted at indicated  
1017 time points post infection and mRNA levels of HCMV *UL44* and *UL83* were determined by  
1018 qRT-PCR. Viral mRNA relative expression ( $\log_{10}$ ) normalised to *GAPDH* is displayed as bar plots  
1019 showing mean  $\pm$  S.D. of two independent experiments performed with experimental duplicates.  
1020 Significant changes were calculated using unpaired two-sided Student's t-tests, n.s. not significant,  
1021 \* $p < 0.05$ , \*\* $p < 0.01$ , \*\*\* $p < 0.001$  and \*\*\*\* $p < 0.0001$ .

1022 **Figure 5. ZAP negatively affects stability of a subset of HCMV transcripts with low CG**  
1023 **content.**

1024 **(A)** WT and ZAP KO HFF-1 cells were untreated or infected by centrifugal enhancement with  
1025 HCMV (MOI 0.1). Newly synthesised RNA was labelled with 4-thiouridine (4sU) for one hour prior to  
1026 cell lysis and lysates were taken at 18 and 72 hpi, followed by RNA purification. SLAM-seq was  
1027 performed to identify newly synthesised and total RNA using GRAND-SLAM. **(B)** Time courses of  
1028 Log<sub>2</sub> fold changes of cellular and viral genes (n=6,488) for total (upper panel) and newly  
1029 synthesised (lower panel) RNA in ZAP KO / WT HFF-1 cells. The values represent the mean of two  
1030 biological replicates. *TNFRSF10D* and *ZMAT3* are indicated in yellow and purple, respectively. **(C)**  
1031 Represented are Log<sub>2</sub> fold changes of cellular and viral genes (n=6,488) for total (x-axis) and newly  
1032 synthesised RNA (y-axis). Values represent the mean of two biological replicates. **(D)** WT, control,  
1033 and two independent ZAP KO HFF-1 cell lines were untreated (UT), mock treated, or infected by  
1034 centrifugal enhancement with HCMV (MOI 0.1). Total RNA was extracted at 8, 24, and 72 hpi, and  
1035 lysates were subjected to total transcriptome analysis. Relative temporal expression levels of gene  
1036 clusters and selected individual genes are represented as a heatmap. Expression of HCMV genes  
1037 was quantified from the RNA-sequencing and relative temporal expression levels calculated by  
1038 dividing per-sample normalised expression values (fpkm) to the sum of these values from the same  
1039 gene over all samples/time points. Based on these values, genes were clustered in nine groups  
1040 representing kinetic classes. Shown are the averages of replicates and clusters (above), as well as  
1041 averages of replicates of selected individual genes (below). **(E)** For HCMV genes, the CG  
1042 dinucleotide content per length and gene was calculated from the HCMV TB40/E annotation in  
1043 accession number MF871618. For human genes, values were calculated from the hg19 Refseq  
1044 annotation. If multiple transcript isoforms were present in the annotation, values per transcripts  
1045 were averaged. Values for HCMV genes are shown as a beeswarm plot to the left, and for both  
1046 human and HCMV as density plots to the right. Selected HCMV genes are labelled in the beeswarm  
1047 plot.

1048 **Tables and their legends**

1049

1050 **Table 1.** Proteome analyses.

1051

1052 **Table 2.** SLAM-sequencing.

1053

1054 **Table 3.** Transcriptome analyses.

1055 **Expanded view figure legends**

1056

1057 **EV1. Codon-optimisation of ZAP does not affect ZAP protein levels.**

1058 HEK 293T cells were transfected with either pEF empty vector (ev), pEF1-ZAP-S-myc/His (WT), or  
1059 pEF1-ZAP-S-myc/His codon-optimised (opt.) (upper panel) or with pEF1-ZAP-L-myc/His WT or  
1060 codon-optimised (opt.) expression constructs (lower panel). Expression levels of ZAP were  
1061 determined by immunoblotting using a ZAP-specific antibody. Actin served as loading control.

1062

1063 **EV2. Presence of ZAP-S and ZAP-L leads to reduced *TNFRSF10D* and *ZMAT3* cellular**  
1064 **transcripts levels.**

1065 WT, ZAP KO, and ZAP KO HFF-1 cells expressing either ZAP-S (blue) or ZAP-L (green) were mock  
1066 treated or infected by centrifugal enhancement with HCMV (MOI 0.1). At 24 hpi, total RNA was  
1067 extracted and qRT-PCR for *TNFRSF10D* and *ZMAT3* mRNA was performed. Cellular mRNA  
1068 expression normalised to *GAPDH* is displayed as bar plots showing mean  $\pm$  S.D. of experimental  
1069 duplicates. One representative of two independent experiments is shown.

1070

1071 **EV3. WT and ZAP KO cells show similar induction of ISGs during HCMV infection.**

1072 WT and ZAP KO HFF-1 cells were untreated or infected by centrifugal enhancement with HCMV  
1073 (MOI 0.1). Total RNA was extracted at 24 hpi, and lysates were subjected to total transcriptome  
1074 analysis. Represented are Log<sub>2</sub> transformed fold changes at 24 hpi compared to untreated cells of  
1075 WT and ZAP KO (g3) cell lines, calculated using edgeR, and plotted against each other. ISGs are  
1076 depicted in red.

1077

1078 **EV4. Relative temporal expression levels of HCMV genes above a reasonable expression**  
1079 **threshold at 8, 24 and 72 hpi.**

1080 WT, control, and two independent ZAP KO HFF-1 cell lines were untreated, mock treated, or

1081 infected by centrifugal enhancement with HCMV (MOI 0.1). Total RNA was extracted at 8, 24, and  
1082 72 hpi, and lysates were subjected to total transcriptome analysis. Expression of HCMV genes was  
1083 quantified from the RNA-sequencing analysis and relative temporal expression levels calculated by  
1084 dividing per-sample normalised expression values (fpkm) to the sum of these values from the same  
1085 gene over six samples of the same cell line. Based on these values, genes were grouped using  
1086 unsupervised clustering, and the clusters, representing kinetic classes, ordered from immediate  
1087 early (top) to late (bottom). In addition, shown to the right is the kinetic classification from Weekes *et*  
1088 *al.* (2014) (immediate early, early, late) where available, or if the gene codes for a non-coding RNA.

**Figures.**

Figure 1.

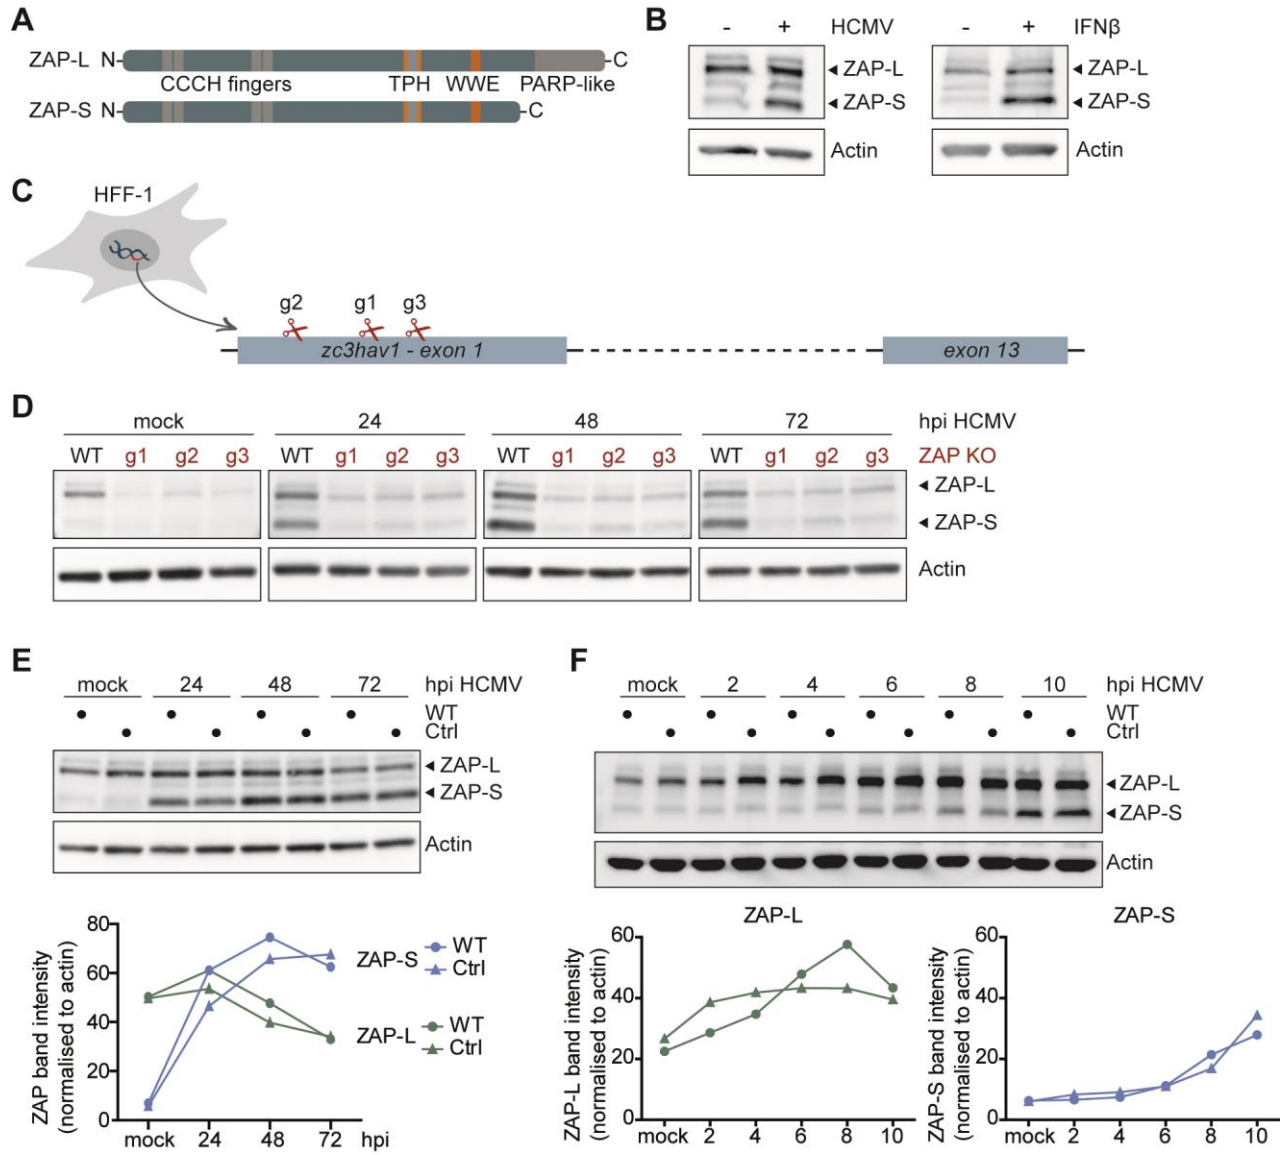

Figure 2.

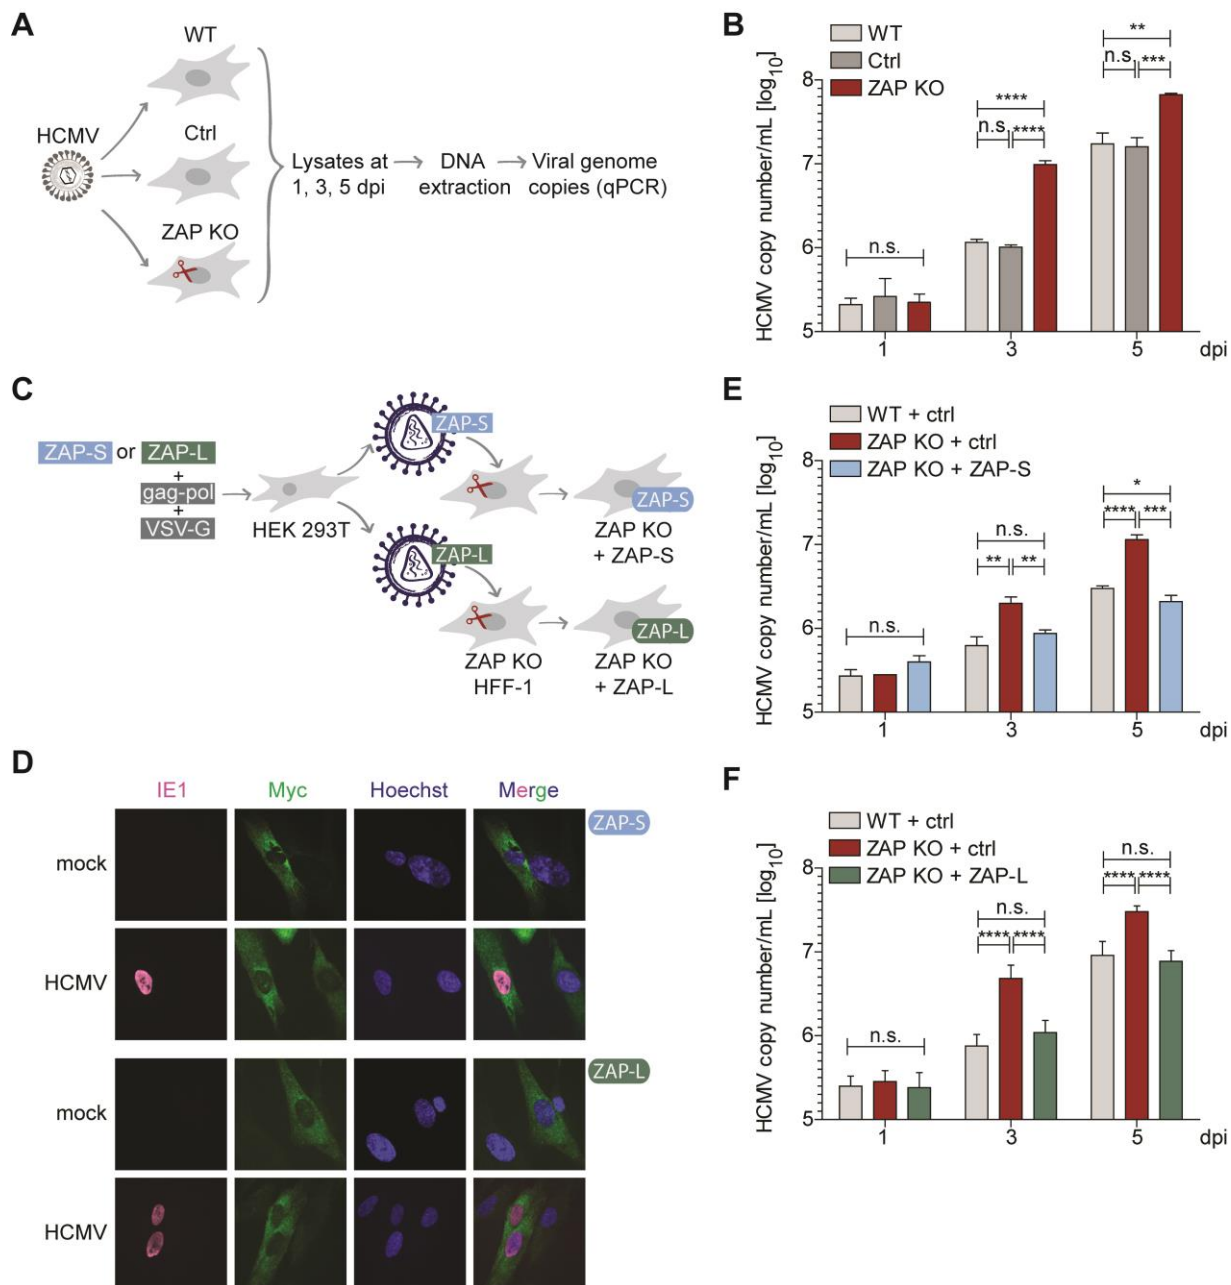

Figure 3.

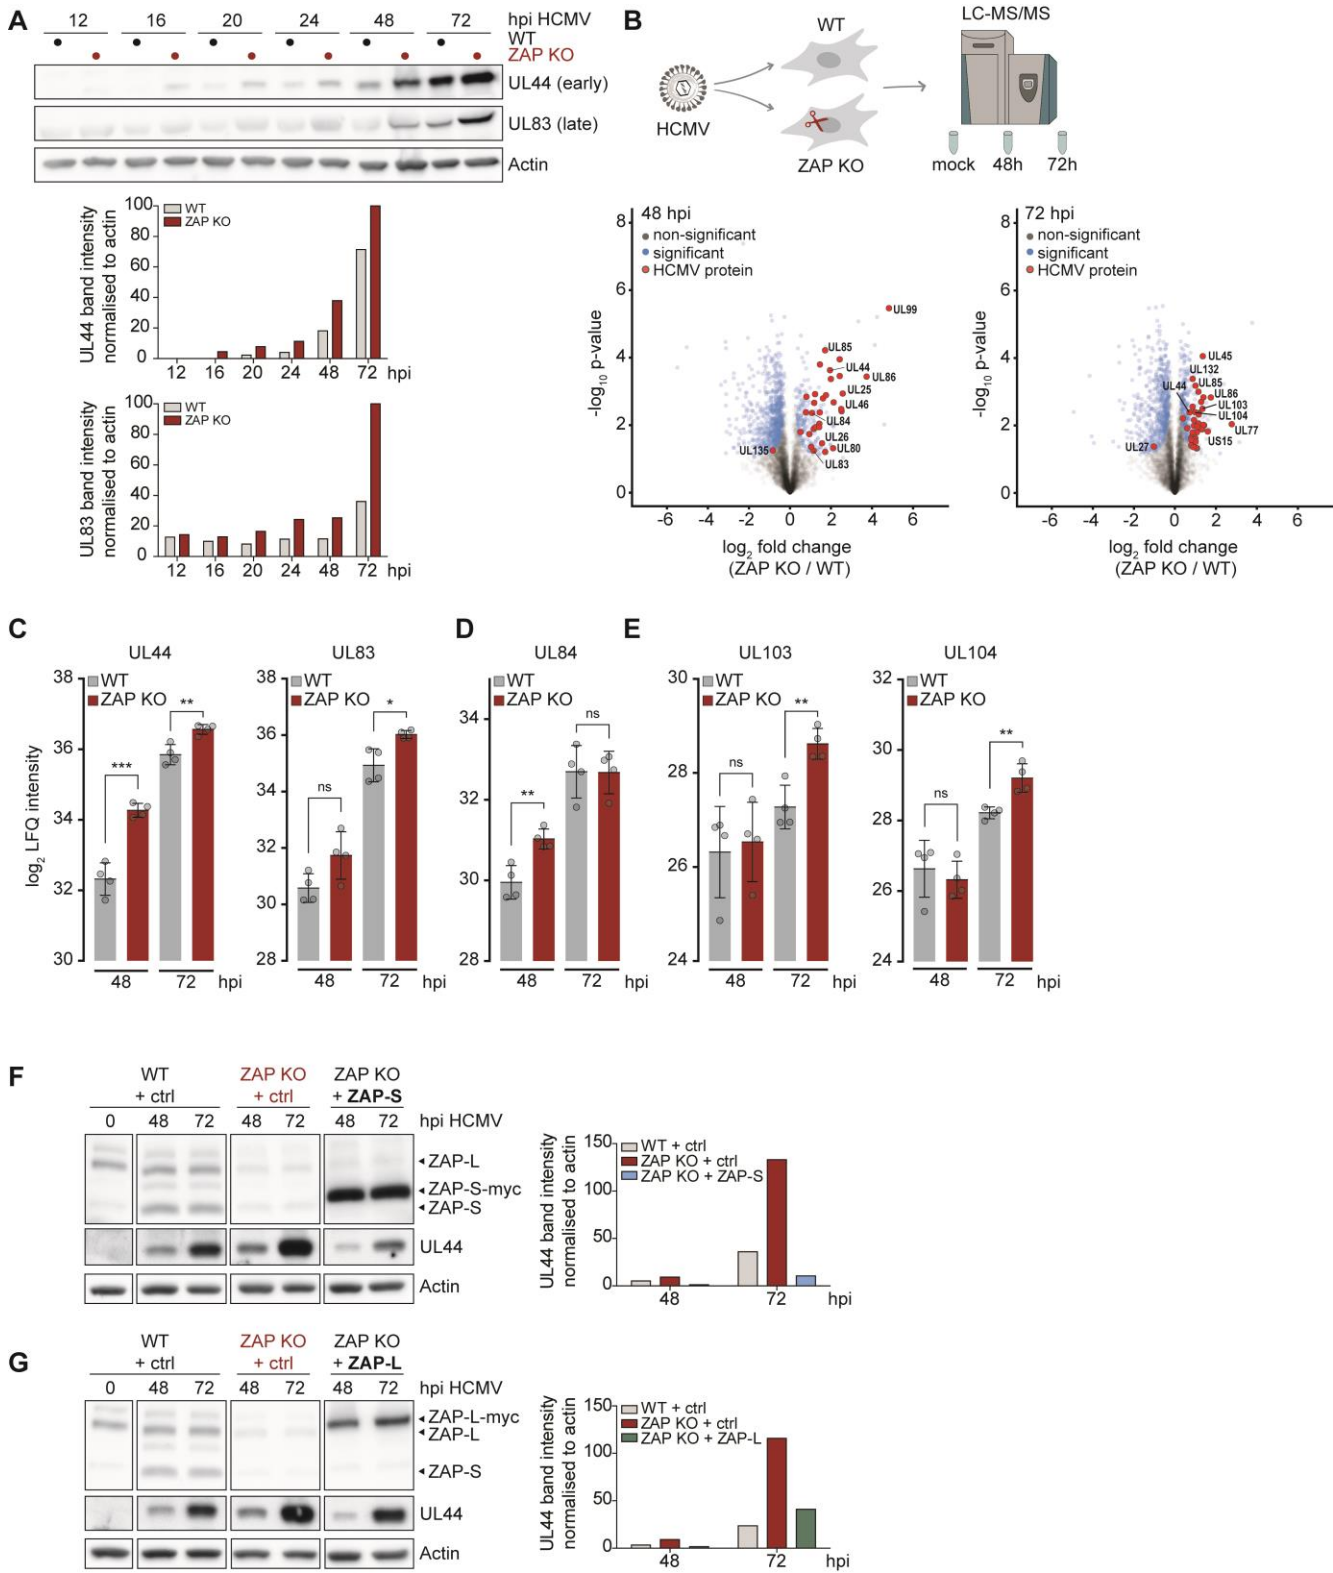



Figure 4.

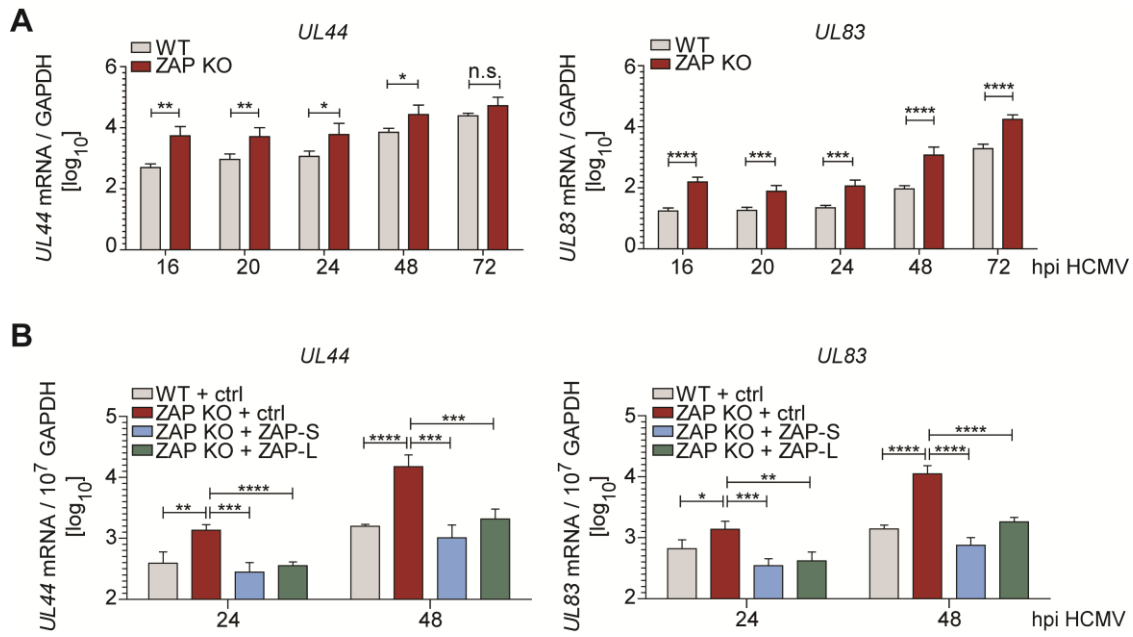

Figure 5.

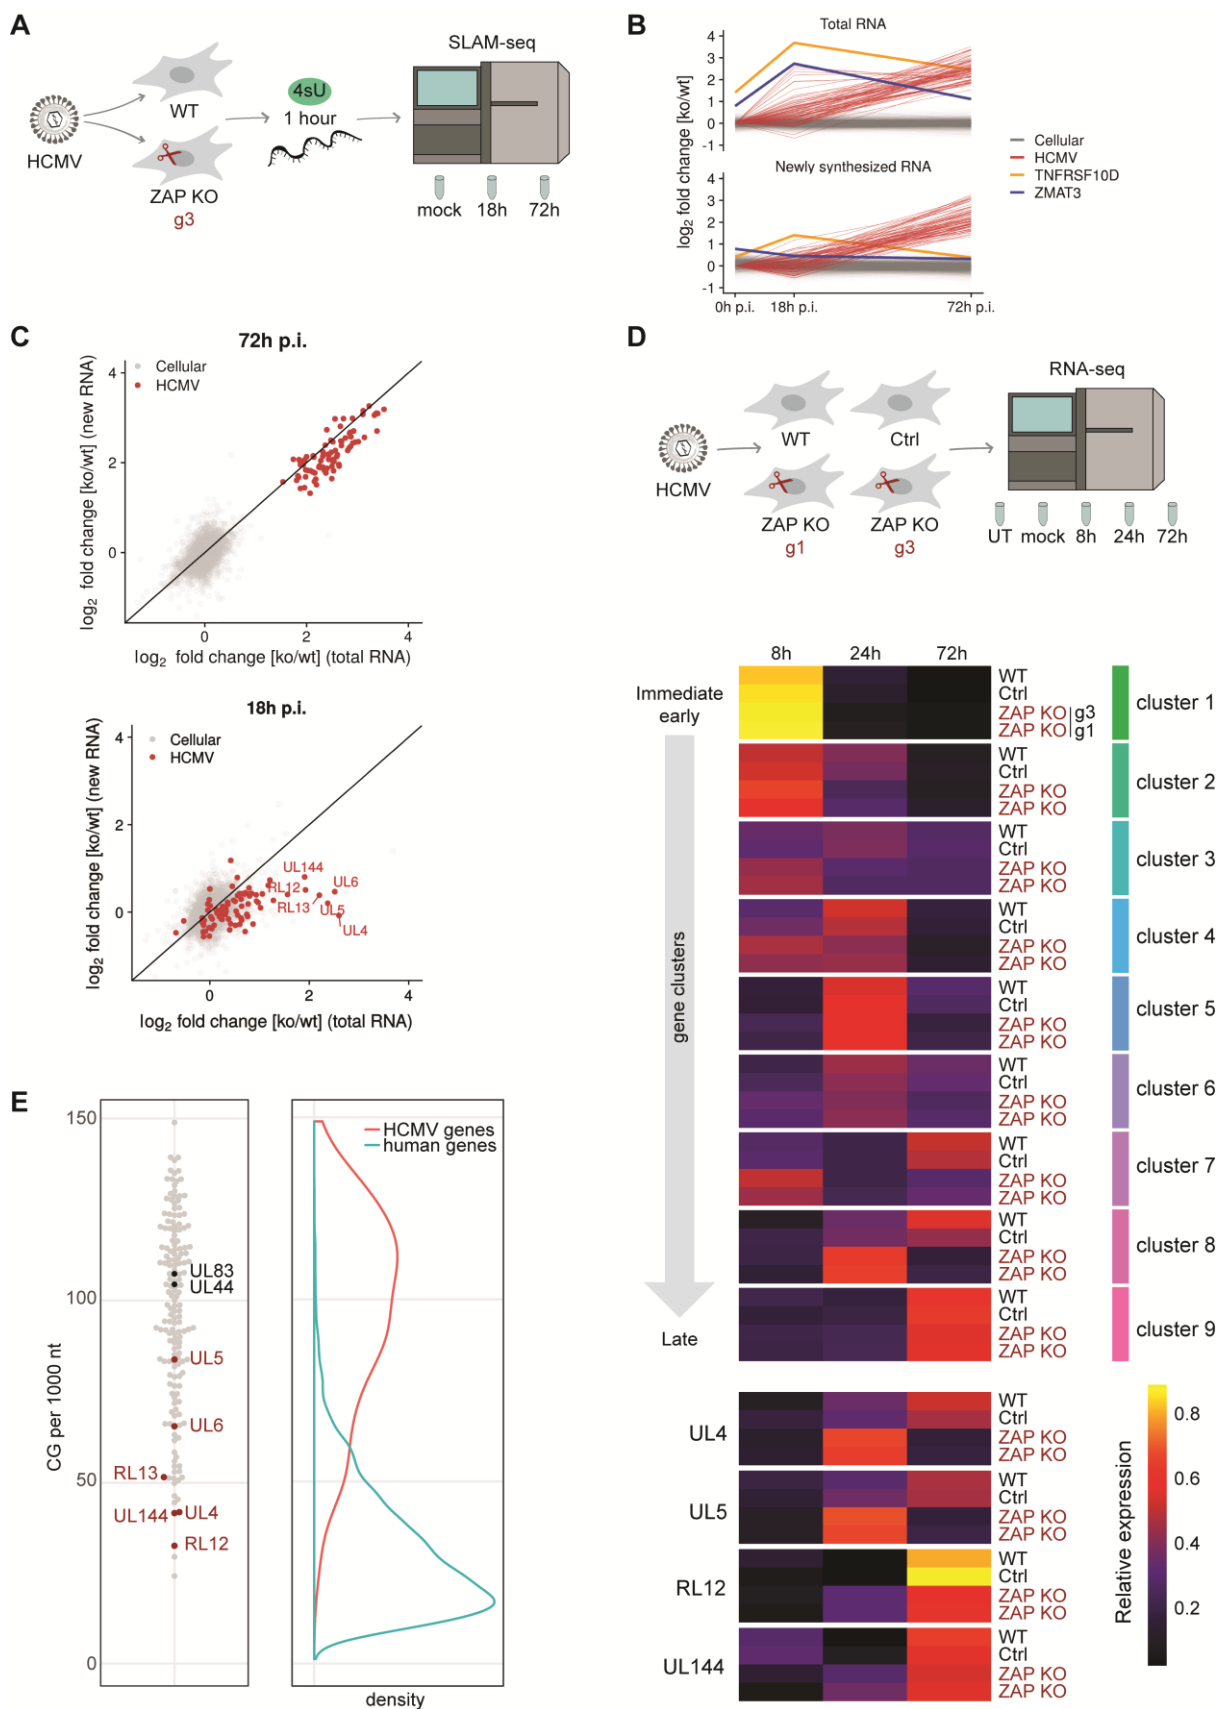

## EV1

HEK 293T

ev WT opt. ZAP-S

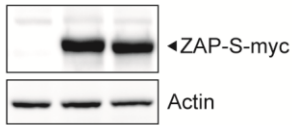

ev WT opt. ZAP-L

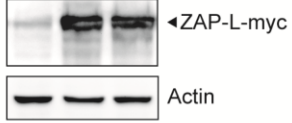

## EV2

*TNFRSF10D*

*TNFRSF10D*

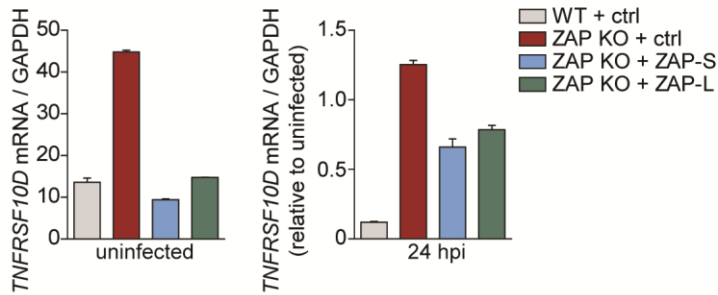

*ZMAT3*

*ZMAT3*

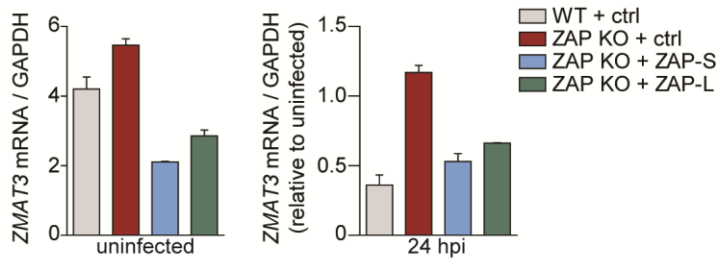

## EV3

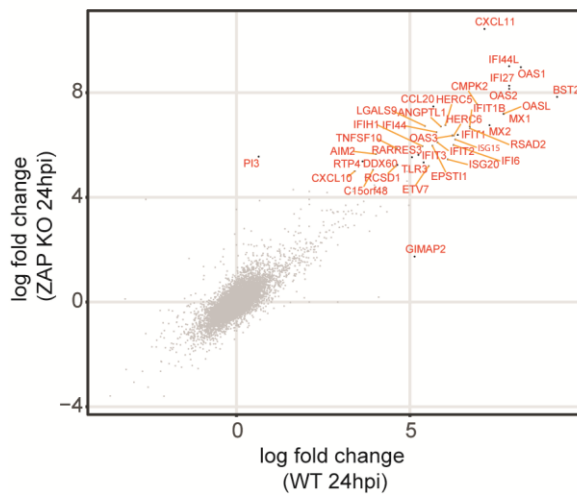

## EV4

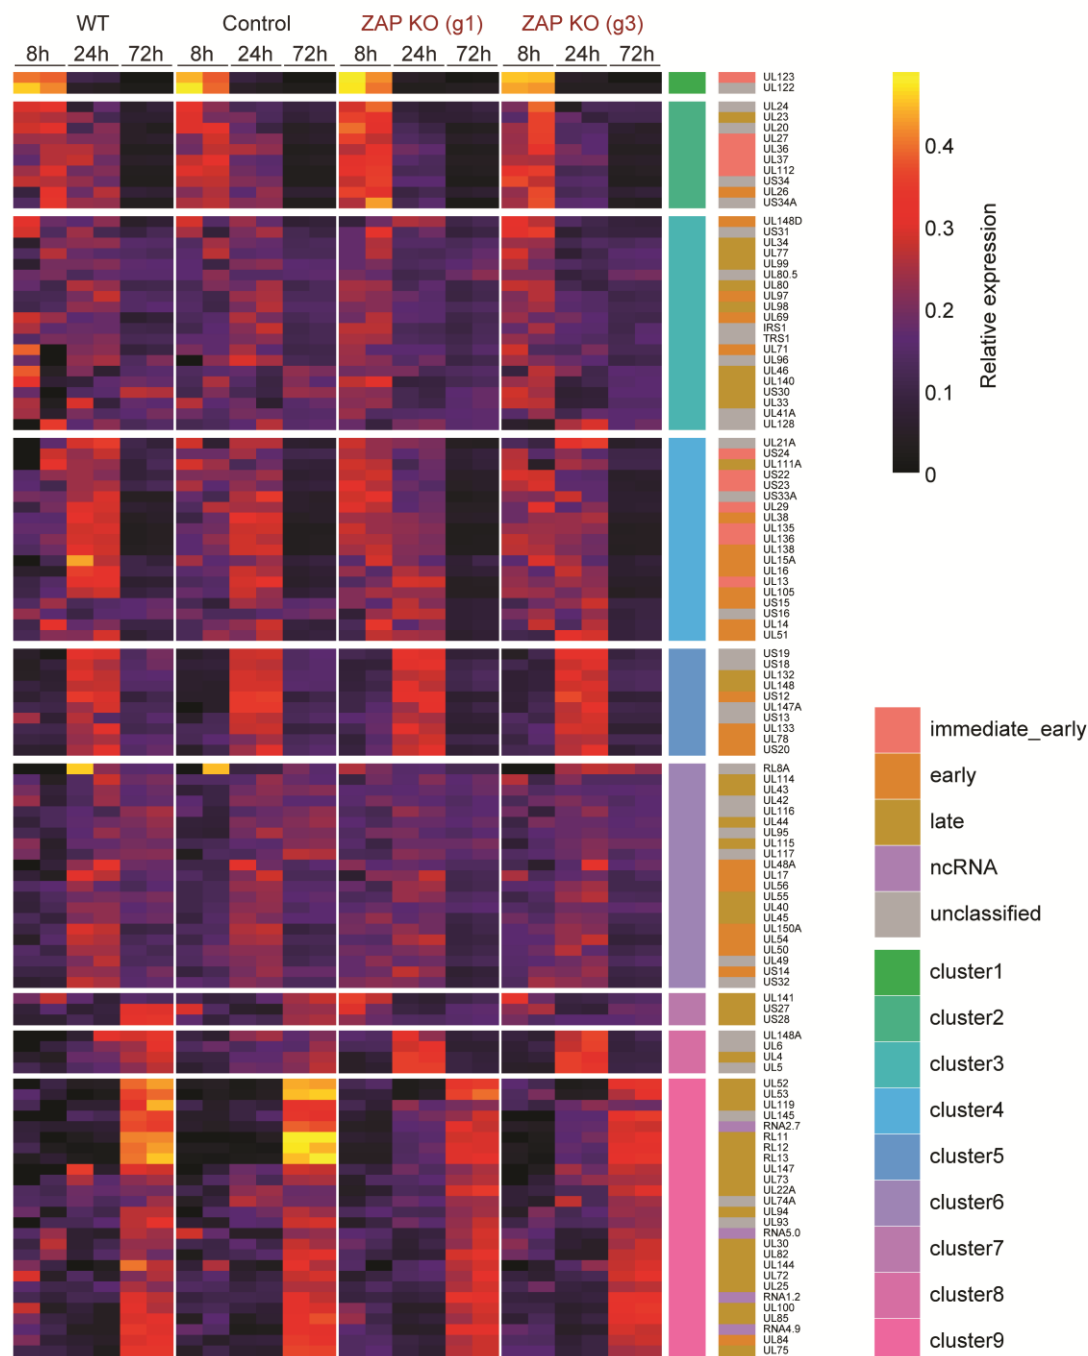

Source: http://biorxiv.org/content/10.1101/2020.09.15.297804v1.full.pdf
